# Microhabitat and ectomycorrhizal effects on the establishment, growth and survival of *Quercus ilex* L. seedlings under drought

Laura García de Jalón<sup>1</sup>, Jean-Marc Limousin<sup>1</sup>, Franck Richard<sup>1</sup>, Arthur Gessler<sup>2</sup>, Martina Peter<sup>2</sup>,  
Stephan Hättenschwiler<sup>1</sup>, Alexandru Milcu<sup>1,3</sup>

<sup>1</sup>CEFE, Univ. Montpellier, CNRS, EPHE, IRD, Univ. Paul Valéry Montpellier 3, Montpellier, France

<sup>2</sup> Swiss Federal Research Institute WSL, Birmensdorf, Switzerland

<sup>3</sup> Ecotron Européen de Montpellier (UPS-3248), CNRS, Campus Baillarguet, Montferrier-sur-Lez, France

Corresponding author: [laura.garciadejalon@gmail.com](mailto:laura.garciadejalon@gmail.com)

**Keywords:** Holm oak, long-term drought, recruitment, ectomycorrhizae, Mediterranean forest, climate change, pathogens.

## Abstract

The success of tree recruitment in Mediterranean *Quercus ilex* forests is threatened by the increasing intensity, duration and frequency of drought periods. Seedling germination and growth are modulated by complex interactions between abiotic (microhabitat conditions) and biotic factors (mycorrhiza association) that may mitigate the impacts of climate change on tree recruitment. To better understand and anticipate these effects, we conducted a germination experiment in a long-term precipitation reduction (PR) field experiment where we monitored seedling establishment and survival, micro-environmental conditions and ectomycorrhizal (ECM) colonization by different mycelia exploration types during the first year of seedling

growth. We hypothesized that (i) the PR treatment decreases seedling survival relative to the control with ambient conditions, (ii) the underlying mechanisms for seedling survival are better understood with detailed information of microhabitat water and light availability irrespective of the PR treatment, (iii) the PR treatment will favour the development of ECM exploration types with drought-resistance traits such as differentiated rhizomorphs. Contrary to our first hypothesis, seedling survival was lower in control plots with overall higher soil moisture. Micro-site light and soil moisture conditions were better predictors of seedling survival and growth than the plot-level PR treatment, confirming our second hypothesis. Furthermore, in line with our third hypothesis, we found that ECM with longer extramatrical mycelia were more abundant in the PR treatment plots and were positively correlated to survival, which suggests a potential role of this ECM exploration type in seedling survival and recruitment. Although summer drought was the main cause of seedling mortality, our study indicates that drier conditions in spring can increase seedling survival, presumably through a synergistic effect of drought adapted ECM species and less favourable conditions for root pathogens.

## Introduction

The success of seedling establishment is one of the most critical processes determining forest regeneration dynamics and long-term persistence of tree species. In Mediterranean forests, where summer drought is already a major cause of mortality of woody species during early life stages [1,2], the success of tree establishment is expected to deteriorate as a consequence of the ongoing climate change. Climate models for the Mediterranean region predict longer and more severe drought episodes in the near future [3] and the first signs of climate change impacts on forests are already documented as tree dieback and crown defoliation [4,5]. As Mediterranean forests are, for the most part, naturally regenerated, a better

understanding and quantification of drought effects on tree recruitment processes is needed to better mitigate the impacts of climate change on forest ecosystems.

The success of tree recruitment under an established forest cover is, however, not only influenced by climate, but also highly dependent on other microhabitat conditions [6–8] and biotic interactions, especially with mycorrhizal fungi [9,10]. The canopy cover and structure generate different microhabitats, for example through different light availabilities that further modulate local soil moisture and temperature conditions, and thus, the overall effect of drought. The canopy can act as shelter in the dry season by protecting against radiative heating, thereby reducing the water vapour pressure deficit at the microhabitat level, and thus the transpiration of seedlings. Conversely, the tree canopy can also reduce the soil moisture available to seedlings due to foliar interception of rainfall, and an increased competition for soil water by the adult trees. In addition to these subtle differences that tree canopies can cause on water availability of understorey seedlings, canopy cover also has a direct effect on light availability. Two studies carried out with *Quercus pyrenaica* in different parts of Spain with different soil moistures revealed higher seedling survival under open canopies in the wet sites [11], and under closed canopies in the dry sites [12]. This suggests a trade-off between light availability and soil moisture, which is in line with the morphological trade-offs between plant tolerance to drought and shade [13]. However some species, such as *Quercus ilex*, are known to tolerate both shade and drought, with the shade contributing to expand their drought tolerance [14]. These species might be favoured in Mediterranean ecosystems where light and water limitations co-occur, especially in the case of seedlings emerging under a dense tree canopy. In theory, the most suitable microhabitat for seedling establishment and growth is a site with enough light to maintain a positive carbon balance, and with sufficient soil moisture to avoid water deficit during the drought seasons. However, the impact of water availability on seedling recruitment is complex and not yet fully understood, with opposite effects of rainfall exclusion being

documented for seedling emergence (increased in drier conditions) and seedling survival (decreased in drier conditions) [15].

There is also increasing evidence that the filamentous fungi known to form plant-fungal chimeras, the so-called mycorrhizae, are critical not only for nutrient uptake and defence against soil pathogens but also for helping plants to cope with the detrimental effects of soil water deficit [9,10,16]. Sheltering adult trees may also facilitate seedling establishment by acting as a fungal inoculum for seedlings and providing a common mycelium network which can be beneficial for the performance of younger generations of plants [17–19]. The widespread Mediterranean tree species *Quercus ilex* is associated with ectomycorrhizal fungi (ECM). In forest ecosystems, these ECM fungi are assembled in highly diverse communities [20] made of patchily distributed species [21]. Species composition of these communities are influenced by water availability, and have been shown to respond to precipitation reduction [22]. Depending on fungal species, ECM vary in the anatomy and morphology of the mycelia radiating into the soil and these morphological variations have been putatively related to ecological functions and types of foraging exploration [23]. According to [23], four different exploration types can be distinguished based on the amount of emanating hyphae: contact, short, medium-distance and long-distance. It has been suggested that ECM root tips with hydrophobic mantles and highly differentiated extensive external mycelium (i.e., the so-called rhizomorphs, developed by species in *Boletus* and *Cortinarius* genera), are resistant to drought and effective at water transport and uptake for their associated hosts [24,25]. However, to the best of our knowledge, the potential interactive effects of microhabitat environmental factors with ECM colonization and exploration types on seed germination and seedling establishment have been little investigated, especially under field conditions. Most studies on seedling ECM colonization have been done in highly artificial conditions (potted plants in greenhouses, applied fungal inoculums, simplified soil substrates) which may be prone to being affected by lab-specific

environmental factors [26] and thus, their relevance for natural field conditions should be interpreted with caution.

In this study, we investigated the effects of increasing drought conditions on the germination, growth and survival of *Q. ilex* seedlings in a long-term field experiment with precipitation reduction (PR) of 29% compared to the unaltered control since 2003. We conducted a germination experiment in the field and monitored seedling establishment and survival, soil humidity and light micro-conditions and ECM colonization of roots during the first year of seedling growth. We hypothesized that: (i) the PR treatment decreases seedling survival relative to the control with ambient conditions [15], (ii) the underlying mechanisms for seedling survival are better understood with detailed information on microhabitat water and light availability, irrespective of the PR treatment, (iii) the PR treatment will favour the development of ECM fungi with drought-resistance traits such as differentiated rhizomorphs with longer external mycelium.

## Materials and Methods

### 1) Experimental site

The study site is located 35 km northwest of Montpellier (southern France) in the Puéchabon State Forest, on a flat plateau (43°44'29'' N, 3°35'45'' E, elevation 270m). This forest has been managed as a coppice for centuries and the last clear cut was performed in 1942. Vegetation is largely dominated by the shade-tolerant evergreen oak *Q. ilex*, with a top canopy height of about 5.5 m and a stand density of *c.* 6000 stems ha<sup>-1</sup>. The understorey is composed of a sparse shrubby layer with the evergreen species, *Buxus sempervirens*, *Phyllirea latifolia*, *Pistacia terebinthus* and *Juniperus oxycedrus*, a percent cover *c.* 25% and a height *c.* 2m.

The area has a Mediterranean-type climate. Rainfall mainly occurs during autumn and winter with about 80% of total annual precipitation occurring between September and April. The mean annual precipitation is 920 mm with a range of 550-1549 mm (1984–2017). Mean annual temperature is 13.3 °C (on-site meteorological station, 1984–2017), the coldest month being January (5.5°C) and the hottest July (22.9°C). The soil is extremely rocky from hard Jurassic limestone origin. The average volumetric fractional content of stones and rocks is about 75% for the top 0–50 cm and 90% below. The stone free fine fraction within the top 0–50 cm layer of the soil is a homogeneous silty clay loam (USDA texture triangle, 38.8% clay, 35.2% silt and 26% sand). Seed germination in *Q. ilex* mostly occurs in early winter and shoot emergence in spring. The below-ground establishment occurs from germination to shoot emergence, when plants invest in their taproot and when the first associations between roots and below-ground microbial communities (ECMs and/or pathogens) take place.

## 2) Rainfall exclusion

In March 2003, a partial throughfall exclusion experiment was set up on the site. The throughfall exclusion experiment was replicated on three blocks 200 m away one from the other, and situated on a flat area with no lateral runoff. Each replication was composed of one throughfall exclusion treatment (henceforth, precipitation reduction, PR) and one control treatment (henceforth, Control), each with a plot area of 140 m<sup>2</sup> (14 m x 10 m). Throughfall exclusion is achieved by using 14 m long and 0.19 m wide PVC gutters covering 33% of the ground area underneath the tree canopy. Taking into account interception losses by the canopy and stemflow, the throughfall exclusion treatment effectively reduces the net input of precipitation to the soil by 29% compared with the control treatment [27]. On the control plots, identical gutters are set up upside down so that the albedo and the understory microclimate are as close as possible in the two treatments. However, gutters in the PR treatment are slightly

tilted down in order to let the water drop out of the plots, different from the Controls where gutters are horizontally placed.

### 3) Sowing, establishment and seedling growth

Acorns from 10 different maternal trees were collected in November 2017 in the surroundings of the experimental site, outside of the precipitation reduction and control treatments. All acorns were submitted to a flotation test in order to discard the ones aborted or damaged by insects or fungi. All the viable acorns were weighted, numbered with a marker pen for identification, and kept in a fridge at 4°C in vermiculite substrate humidified with water for 3 weeks. Sowing was done in December 2017, placing acorns 1 cm deep into the soil in the understory of the experimental site. In order to prevent acorn predation, sowed acorns were enclosed in wire cages of 40 × 30 × 30 cm. One acorn from each maternal tree was sowed in each cage, thus totalling 10 acorns par cage. A total of 60 cages were randomly installed in areas not occupied by stones (30 cages per treatment, 20 per block), so 600 acorns in total were used in the study.

Recruitment stages (germination, stem emergence and survival) were monitored monthly from January 2018 to the end of November 2018 in all seedlings from all cages. Two metrics of survival, and hence mortality, were considered in the study: survival from germination to the collection of the seedlings after 11 months was considered as ‘total survival’ ( $S_T$ ), and survival from stem emergence to the collection of seedlings after 11 months was considered as ‘survival of emerged plants’ ( $S_{EP}$ ). Stem height was measured in all seedlings from all cages at the end of the experiment in November 2018. At this time, all seedlings from half of the cages randomly chosen (15 cages per treatment, 10 per block) were pulled out from the soil for ECM analysis and biomass assessments. Aerial and belowground seedling parts were separated, the aerial

parts were oven-dried at 60° C until constant mass for biomass measurements, and belowground parts were used for ECM assessments.

#### **4) Microenvironmental conditions**

Soil water content and light availability were measured several times during the one-year experiment for each of the cages. Two measurements per cage were taken at two different positions of the cage that were averaged to get the final value for both soil water content and light measurements at each measuring time. Volumetric soil water content (SWC) was measured six times in the year in the first 10 cm of soil with a portable TDR (Delta-T SM150 Soil Moisture kit, Cambridge, UK), and light availability was measured in Spring and Autumn with a LAI-2200 Plant Canopy Analyser (LI-COR Biosciences, Lincoln, NE, USA). As the plant or leaf area index over the cages could not be measured because of the shading from the gutters installed in the plots, the canopy gap-fraction (GF) around a zenith angle of 38° was used as an integrative proxy of the local light availability. Simultaneous measurements of incident light above and below the canopy were taken with the LAI-2200, and the GF was computed using the FV2200 2.1.1 software (LI-COR Biosciences). GF was preferred to a simple ratio between the light below and above the canopy so as to avoid the confounding effects due to differences of the solar angle or of the fraction of direct and diffuse light at the time of measurement.

#### **5) ECM quantification**

At the end of November 2018, eleven-month old seedlings (alive and dead) from half of the cages of both treatments and blocks (30 cages and 129 plants analysed) were carefully dug up by hand with the aim to collect the largest part of the root systems down to 15 cm depth. Due



to the very rocky nature of the soil, it was not possible to harvest roots that were growing deeper than 15 cm. Seedlings were brought to the lab and kept in the fridge for a week before ECM quantification under a dissecting microscope. The collected root system was kept in water in trays for several hours in order to remove organic and mineral soil particles from the roots. On the extracted root systems, the percentage of root colonization by ectomycorrhizal fungi was quantified under the microscope, by counting the number of colonized and non-colonized root tips. We quantified both alive and dead ECM root tips in order to assess the existing ECM community associated at each seedling. Each ECM root tip was classified according to the different exploration types defined by [23] based on the amount, organization and length of emanating hyphae (contact, short, and medium-distance). No long-distance ECM was found associated to the root tips of *Quercus ilex* seedlings, so this exploration type was omitted from analyses. Proportions of each exploration type were calculated by dividing the number of ectomycorrhizae of each exploration type respective by the total number of root tips of the root system (Equation 1 and 2).

$$ECMc = \frac{n^{\circ} \text{ contact root tips}}{n^{\circ} \text{ total of root tips}} \quad (1)$$

$$ECMsm = \frac{n^{\circ} \text{ short} + \text{medium root tips}}{n^{\circ} \text{ total of root tips}} \quad (2)$$

With ECMc being the proportion of contact exploration type root tips and ECMsm the proportion of short and medium exploration type root tips.

## 6) Statistical analyses

All statistical analyses were performed with the R software version R 3.4.1 (R Core Team, 2017). The effect of rainfall exclusion treatment on soil water content and gap fraction were analysed using a mixed linear model with the date of measurement as random effect. The other

variables were analysed using generalized mixed linear models with fixed factors being rainfall exclusion treatment, soil water content (SWC), canopy gap fraction (GF) and acorn mass (as covariable), and random effects being the block of the PR experiment, the cage and the mother tree using *glmer* function from ‘lme4’ package version 1.1-21 [28]. An example of the syntax for a model looking at germination success is as follows “*model<- glmer (Germination ~ PR\_treat + SWC \* GF \* acorn\_mass + (1|Block) + (1|Cage) + (1|ID\_mother\_tree), family=binomial)*”. Binomial variables such as germination and survival were modelled with binomial distribution, and proportion data such as ECM colonization with betabinomial distribution. Minimal adequate models with the lowest AIC were obtained following the guidelines of [29] with the help of the “buildmer” package version 1.4 [30]. Interaction between ECM colonization and environmental variables were displayed with the “interactions” package version 1.1.1 [31] and the survival curves with the “survival” package version 3.1-8 [32].

## Results

### 1) Effects of precipitation reduction treatment on microhabitat conditions

Soil water content measurements at the microhabitat/cage level confirmed significantly lower soil moisture levels (-11%) in the precipitation reduction treatment (PR) than in the Control (P<0.001; Fig 1). The lowest soil water content values were observed in August and in September during the peak of the seasonal drought characteristic of the Mediterranean region, with lowest mean values of 2.1% in Control and 1.2% in PR in September. On the contrary, the highest soil water content values were observed in April with 27% in Control and 26% in PR

treatment. There was a large variability in SWC among microsites with a strong overlap of values between treatments whichever the measurement period.

**Fig 1: Volumetric soil water content (SWC % volumetric) per treatment measured from March to October 2018.** Precipitation reduction treatment (PR, in red) and control (in blue). Each dot indicates one microhabitat at each of the 60 cages. The effect of the PR treatment on SWC measurements was significant at  $P < 0.001$ .

Similar to the microsite-specific SWC, we observed a large variability and an important overlap of GF values between treatments, indicating highly different light conditions among microhabitats (Fig 2). The PR treatment, in which gutters are slightly tilted down and therefore closer to cages, showed an overall lower average GF value compared to the Control (7% and 8.8%, respectively) ( $P = 0.02$ ; Fig 2).

**Fig 2: Gap fraction (%) per treatment measured in April and September 2018.** Precipitation reduction treatment (PR, in red) and control (in blue). Each dot indicates one microhabitat at each of the 60 cages. The effect of the PR treatment on GF measurements was significant at  $P = 0.02$ .

## 2) Germination and survival

The proportion of germinated acorns increased with the initial seed resources (acorn fresh biomass) (Table 1) but was not significantly affected by the precipitation reduction treatment (PR), nor by any of the measured micro-environmental variables.

**Table 1. Fitted estimates and significance levels of linear mixed models of seedling germination, survival and growth.** It is tested the effects of precipitation reduction (PR) treatment, acorn fresh biomass (Acorn), gap fraction (GF), soil water content (SWC) and their respective interactions on germination, total survival ( $S_T$ ), survival of emerged plants ( $S_{EP}$ ), height and shoot biomass, contact ectomycorrhizal colonization (ECMc) and short + medium ectomycorrhizal colonization (ECMsm).  $R^2_m$  represents the variance explained by fixed factors and  $R^2_c$  represents the variance explained by fixed and random factors. NA = non applicable, as  $R^2_c$  cannot be computed for beta binomial distributions. \*\*\* for  $P < 0.001$ , \*\* for  $P < 0.01$ , \* for  $P < 0.05$ , + for  $P < 0.07$ .

| Variable/ Predictor                  | PR      | Acorn              | GF     | SWC     | Acorn×GF | GF×SWC | $R^2_m$ | $R^2_c$ |
|--------------------------------------|---------|--------------------|--------|---------|----------|--------|---------|---------|
| Germination                          |         | 0.231 <sup>+</sup> | 0.1672 |         |          |        | 0.02    | 0.29    |
| Total survival ( $S_T$ )             | 0.482*  | 0.272**            | 0.211* |         |          |        | 0.04    | 0.11    |
| Survival emerged plants ( $S_{EP}$ ) |         | 0.238*             |        | -0.203* |          |        | 0.03    | 0.03    |
| Height                               | -1.468* | 1.233***           |        |         |          |        | 0.15    | 0.27    |
| Shoot biomass                        |         | 0.042***           |        | -0.016* |          |        | 0.22    | 0.22    |
| Root biomass                         |         | 0.047***           |        |         |          |        | 0.23    | 0.23    |

|                   |          |         |                    |          |      |    |
|-------------------|----------|---------|--------------------|----------|------|----|
| ECM <sub>c</sub>  |          | -0.231* | 0.148 <sup>+</sup> | 0.496*** | 0.15 | NA |
| ECM <sub>sm</sub> | 0.536*** | -0.192* | -0.263**           |          | 0.12 | NA |

Total survival ( $S_T$ ) of seedlings after eleven months was significantly higher (29%) in the PR treatment relative to Control (22%) (Fig 3 and 4B), and was higher in seedlings from bigger acorns and growing under more open canopies (Table 1). The survival of emerged plants ( $S_{EP}$ ) (i.e. the survival of seedlings that already succeeded germination and stem emergence) also increased with seed resources (acorn biomass), and it was significant lower in the wetter micro-sites (Table 1; S1 Fig), with no influence of light. Seedling mortality during germination was similar in seedlings from different drought treatments (25.7% Control vs. 23.7% in PR, respectively). Mortality in spring when below-ground establishment and stem emergence occurred was slightly higher in the Control than in PR treatment (15.6% Control vs. 12% PR respectively). The highest seedling mortality was observed during the summer drought season and was slightly higher in the Control than in the PR treatment (33.7% Control vs. 31.3% PR respectively). Finally, mortality in autumn during the drought recovery was modest in comparison and similar between treatments: 3.3% in Control vs. 3.7% in PR treatment, respectively.

**Fig 3. Survival of seedlings per treatment during the experiment.** (A) Survival curves in the precipitation reduction treatment (PR, in red), and in the control (in blue). Values at “end of germination” corresponds to germination percentage in Fig 4A, and values at “Collection” corresponds to total survival ( $S_T$ ) in Fig 4B. (B) Grey polygon represents the cumulative difference between the two survival curves, total survival in PR minus total survival in Control. The drought period of the year 2018 is highlighted in clear grey.

**Fig 4. Effect of precipitation reduction treatment on germination, survival, height and shoot biomass of seedlings.** (A) Germination and (B) Total survival ( $S_T$ ), per cage  $n = 60$ . (C) Height measured at the end of the experiment (November 2018) per individual  $n = 153$  (alive plants from all cages) and (D) shoot biomass per individual  $n = 96$  (alive plants from half of the cages). \*\*\*  $P < 0.001$ , \*\*  $0.001 < P < 0.01$ , \*  $0.01 < P < 0.05$ , +  $0.05 < P < 0.07$ .

### 3) Growth

The height of the surviving seedlings was lower (-10%) in the PR treatment compared to Control (Table 1; Fig 4C). Heavier acorns with more initial seed resources were observed to produce taller and heavier seedlings in both treatments (Table 1). Shoot biomass was negatively influenced by the soil moisture of the micro-sites, but it was not significantly impacted by the PR treatment (Table 1; Fig 4D). Contrary to soil humidity, light availability at the microsite level did not have any influence on seedling growth (Table 1).

### 4) Ectomycorrhizal colonization and correlations with seedling performance

Ectomycorrhizal colonization assessed as the proportion of mycorrhizal root tips per seedling ranged from 61 to 100%. Overall, the proportion of contact exploration type (ECMc) was slightly but not significantly lower in the PR treatment (-6.5%; Fig 5A) relative to the Control, whereas the proportion of short and medium exploration types (ECMsm) was significantly larger in the PR treatment compared to the Control (+59.7%; Fig 5B). In terms of micro-environmental conditions, the colonization with ECMc was affected by the interaction between soil moisture and light availability (Table 1; Fig 6A); the proportion of ECMc increased under more optimal conditions with high SWC and light availability, but decreased with light availability when SWC was low. The colonization of root tips with ECMsm was affected by the interaction between acorn biomass and light availability (Table 1; Fig 6B). ECMsm was high for seedlings with low seed biomass, with a slight increase of proportions of ECMsm with increasing light availability. In contrast, in seedlings originating from heavy acorns, ECMsm decreased with increasing light availability. In other words, seedlings originating from heavy seeds and growing with relatively favourable light availability, they recruited less ECMsm.

**Fig 5. Proportion of different ECM exploration types per total number of root tips.** (A) Contact ectomycorrhizal exploration type ECMc and (B) short and medium ectomycorrhizal exploration type ECMsm per individual n=129 (all plants from half of the cages). \*\*\* P<0.001, \*\* 0.001<P<0.01, \* 0.01<P<0.05, + 0.05<P<0.07.

**Fig 6. Significant interactions from mixed linear models of ECM colonization (Table 1).** It is showed how the canopy gap factor (GF), a proxy of light availability interacts with soil water content (SWC) and acorn biomass to affect the proportion of mycorrhized root tips with (A) contact (ECMc) and (B) short and medium ectomycorrhizal (ECMsm) exploration types, per individual n=129 (all plants from half of the cages).

When looking at the relationship between ECM colonization and seedling performance and growth of emerged plants, we found that the proportion of ECMsm colonized root tips was positively correlated with seedling survival and stem height, while the proportion of ECMc was negatively correlated with shoot biomass (Table 2).

**Table 2. Model estimates and significance levels from linear mixed-effect models of ECM root tip colonization.** It is tested the impact of contact ectomycorrhizal exploration type (ECMc) and short + medium ectomycorrhizal exploration type (ECMsm) on seedling survival, height and aerial biomass. R<sup>2</sup>m represents the variance explained by the fixed factors and R<sup>2</sup>c the variance explained by random and fix factors. \*\*\* P<0.001, \*\* 0.001<P<0.01, \* 0.01<P<0.05, + 0.05<P<0.07.

| Variable                                   | ECMc    | ECMs+m | R <sup>2</sup> m | R <sup>2</sup> c |
|--------------------------------------------|---------|--------|------------------|------------------|
| Survival emerged plants (S <sub>EP</sub> ) | 1.334   | 3.675* | 0.05             | 0.08             |
| Height survived                            |         | 4.776* | 0.03             | 0.28             |
| Shoot biomass survived                     | -0.063* |        | 0.03             | 0.13             |

## Discussion

In this study we combined a long term precipitation reduction experiment established for 15 years with an acorn germination experiment to get further insights into the factors controlling germination, seedling establishment, growth and the links with ectomycorrhizal colonization in holm oak, a tree species structuring Mediterranean landscapes at low elevation in the western part of the basin [8].

# 1) The impact of the precipitation reduction treatment on survival

Edaphic drought due to precipitation reduction is known to prevent or limit the success of *Q. ilex* seedling recruitment at two important stages. First, acorns being desiccation-sensitive seeds, they may lose their ability to germinate if they dehydrate during winter dry spells [33]. Second, summer drought episodes that are characteristic of the Mediterranean climate, impose severe plant water stress that can be readily lethal to young seedlings [12]. In our experiment, the results showed that summer drought was the most important cause of mortality (Fig 3), thereby confirming the critical role of water stress in determining the success of seedling establishment. Failure to germinate was the second cause of mortality (Fig 3), being most likely not caused by winter seed dehydration since the winter of 2018 was relatively wet (49% of the mean annual precipitation was already fallen from January to March) and we kept the acorns in humid conditions before sowing in order to maximize their chances of germinating. However, in contrast to our first hypothesis, the total seedling survival ( $S_T$ ) after 11 months was higher in the PR treatment than in the Control with ambient conditions (Fig 4B). Additionally, the survival of emerged plants ( $S_{EP}$ ) was higher for seedlings growing in soil microhabitats with lower soil moisture. These two results indicate that, although summer drought was the main cause of mortality in both treatments, the partial rain exclusion treatment did not further increase seedling mortality. Instead, we found higher mortality in control plots during spring and at the end of the summer drought. Although surprising, negative effects of higher soil moisture conditions on seedling survival have been previously reported [34,35], and were explained by sporadic water logging hampering radicle development and respiration. Waterlogging does not readily occur at our study site because the rocky soil of the experimental site (that includes over 70% calcareous stones), allows for a very fast water infiltration into the deeper soil horizons even during very heavy rainfall events. Therefore, we argue that the higher

seedling mortality under the wetter soil conditions of the Control treatment may have been rather related to biotic factors such as soil pathogens. In particular, root infection by Oomycetes is favoured by high soil moisture needed for sporulation and zoospore dispersion [36]. Plantations and natural forests of *Q. ilex* have indeed been severely damaged by the exotic and highly destructive Oomycete root pathogen *Phytophthora cinnamomi* [37,38], which has been proposed as the main factor for oak decline in Spain and Portugal; and the complete mortality of *Q. ilex* seedlings growing in *P. cinnamomi* infested soils has been observed after waterlogging combined with subsequent water deprivation [39]. Additionally, important root damage was observed at higher levels of soil moisture in *Quercus suber* seedlings growing in soils inoculated with *P. cinnamomi* [40]. Therefore, one possible explanation that is in line with the mortality patterns observed in Fig 3 as well as the higher mortality in the Control treatment is that the wetter soil conditions increased the likelihood of root infection with oomycetes presumably started during root system establishment in spring before the soil started drying (Fig 3). Then during summer drought, a slightly higher soil moisture could be even more detrimental as it might still allow the maintenance of oomycetes, thereby explaining the higher mortality found in the Control compared with PR. Additionally, infected plants with oomycetes-damaged root tips could then also be more vulnerable to drought in late summer because they may less well associate with drought-alleviating root mutualists such as ECM. This emerging conjecture needs, however, to be further tested with specific analyses of the pathogen presence and abundance in our experimental site as well as the presence of lesions on plant tissues.



## 2) Effects of microhabitat environmental conditions on survival and growth

Consistent with our second hypothesis, microhabitat conditions were found to be important drivers of early establishment success. Light and soil moisture conditions measured at the microhabitat (cage) level were retained as significant predictors in 7 out of the 8 response variables we assessed (Table 1). In contrast, the PR treatment was retained for only 3 out of 8 variables. This clearly indicates the importance of including the actual microhabitat conditions in studies aiming to understand germination and seedling survival. Our results show that light affected positively the total survival of seedlings but not the survival of emerged plants. This suggests that the positive effect of light is more important in the first stages of life (from germination to stem emergence and shoot development) than once stems are emerged and have to deal with drought, because light exposure could increase seedling desiccation during periods with water deficit. These results agree with earlier studies [15] reporting that seedling germination and emergence increased linearly with light availability, but that seedling survival decreased because the light availability increases the risk of desiccation of seedlings in drier sites [12]. Pathogen infection was also presumably responsible for the negative effect of soil moisture on plant aerial biomass, since the infection could reduce growth.

Another finding of this study is that acorn biomass, here interpreted as the initial resources present in the acorns, is one of the most consistent predictors of germination, survival and growth. This is in line with several studies performed with *Quercus* sp. [41–43] and confirms earlier evidence that seed size is one of the most important traits influencing the early phases of the plant's life cycle. During the first year of their life, young *Q. ilex* seedlings have been shown to depend more markedly on their seed reserves than on the environmental conditions where they grow [44]. It is likely that once these reserves are consumed, microhabitat light

conditions will gain in importance during later stages of seedling growth and survival beyond the first year after germination.

### 3) Effects of mycorrhiza exploration types on survival

The PR treatment favoured the root colonization of young seedlings with ECM exploration types that have longer mycelia (short and medium exploration types, ECMsm) and decreased the colonization with contact ECM (ECMc, Fig 5). This is in line with our third hypothesis stating that seedlings growing in more water limited conditions develop typical drought-adapted ECM morphotypes with differentiated rhizomorphs because these have a better capacity to forage nutrients and water from further distances [23,24,45]. Apart from their function in increasing nutrient foraging, ECMs can also act as biological deterrents to root pathogens as there is evidence that extended extramatrical mycelia and denser mycelia mantles can also act as physical barriers to pathogen infection. In fact, [46] found lower abundance of extramatrical hyphae and less dense mantles in *Phytophthora cambivora* infected and declining chestnut stands, compared to non-infected chestnut stands. Similarly, [47] found that declining *Quercus robur* stands were associated with less long-distance and more short-distance exploration types (contact, short and medium) than what they found in healthier *Q. robur* stands. This potential role of ECM species with longer mycelia in reducing pathogen infection could help to understand the positive relation between ECMsm and seedling survival and height found in our experiment (Table 2). Furthermore, some ECM species have the ability to decrease the virulence of *Phytophthora* through exudation of antibiotics or terpenes with deleterious effects on pathogens [48]. Several studies comparing the declining status of *Q. ilex* stands revealed a negative correlation between ECM abundances and the abundances of pathogens and saprobes [49]. In the same vein, a decrease in vital root tips (ectomycorrhized with well-

developed mantles) combined with an increase of non-vital root tips (non-mycorrhized and deteriorated roots) that are more vulnerable to pathogen infection was found in declined *Q. ilex* stands [50]. At our study site, significant changes in ECM community composition, but not in total species richness, were found in the PR treatment compared to the Control [22]. It could be hypothesized that the ectomycorrhizal community in the PR treatment is the result of the selective pressure exerted by the long-term reduced water availability that favoured ECM species with abundant/more extramatrical mycelium, which may improve seedling persistence under drought conditions even if they require more carbon investment by the host seedlings. These drought-adapted ECM species may increase seedling survival in PR treatment through higher forage capacity, but also by being physical barriers against root pathogens. However, such potential mechanisms of how different ECM species may affect seedling performance need more detailed studies and our data do not allow to infer any causal relationships.

In terms of micro-environmental conditions, light availability was found to modulate ECM colonization in interaction with soil moisture or initial seed mass depending on the type of mycorrhiza exploration (Fig 6). Light had a negative effect on ECMc in drier microsites, but a positive effect in more humid microsites. This is consistent with the hypothesis that light modulates the soil drying through the evaporative demand, so that being under shadow in drier soils could be beneficial to maintain soil humidity and thereby increase the chances of being colonised by contact mycorrhiza that are more adapted to more humid soils. Besides, the interactive effect of seed mass and light on ECMsm suggests that even root colonization by mycorrhizae could be affected by the initial acorn resources, which is an aspect that, to the best of our knowledge, has not been reported previously.

## Conclusions

Although summer drought was the main cause of seedling mortality, our study indicates that that drier conditions in spring can increase seedling survival, presumably through a synergistic effect of drought adapted ECM species and less favourable conditions for root pathogens infection. However, it is important to put this finding in context of a particularly wet year during 2018 when we carried out our experiment. Rainfall events were intense both in spring and autumn, and they were combined with a severe drought period in summer, all of which represent favourable conditions for pathogen infection in *Q. ilex* [39]. Notably, acorn biomass was one of the most consistent variables positively affecting germination, survival and growth, and it even influenced ECM colonization. However, as acorn biomass and numbers are expected to decrease in a near future due to more intense and longer summer droughts [51–53], seedlings may have a lower probability of survival because the acorn bearing trees will allocate less resources to their offspring, and the regeneration of *Q. ilex* stands could be threatened by the drought impact on maternal effects.

## Acknowledgements

The authors gratefully acknowledge Patrick Schevin, Quentin Lassus, and Adrien Millan for helping with the field work. The authors are also indebted to Jean-Marc Ourcival who designed and maintained the long-term rainfall exclusion experiment in Puéchabon throughout the years, and to David Degueldre, Thierry Matthieu, Pauline Durbin and Karim Piquemal for their help. The Puéchabon experimental site belongs to the OSU OREME (UMS 3282) and is annually supported by the research infrastructure AnaEE-France (ANR-11-INBS-0001) and by Allenvi through the SOERE F-ORE-T.

481

## 482 Bibliography

- 483 1. Herrera CM, Jordano P, Lopez-Soria L, Amat JA. Recruitment of a Mast-Fruiting, Bird-  
484 Dispersed Tree: Bridging Frugivore Activity and Seedling Establishment. *Ecol Monogr.*  
485 1994;64: 315–344. doi:10.2307/2937165
- 486 2. Gómez-Aparicio L, Gómez JM, Zamora R. Microhabitats shift rank in suitability for  
487 seedling establishment depending on habitat type and climate: Spatiotemporal patterns of  
488 seedling establishment. *J Ecol.* 2005;93: 1194–1202. doi:10.1111/j.1365-  
489 2745.2005.01047.x
- 490 3. Giorgi F, Lionello P. Climate change projections for the Mediterranean region. *Glob*  
491 *Planet Change.* 2008;63: 90–104. doi:10.1016/j.gloplacha.2007.09.005
- 492 4. Carnicer J, Coll M, Ninyerola M, Pons X, Sanchez G, Penuelas J. Widespread crown  
493 condition decline, food web disruption, and amplified tree mortality with increased  
494 climate change-type drought. *Proc Natl Acad Sci.* 2011;108: 1474–1478.  
495 doi:10.1073/pnas.1010070108
- 496 5. Gentilesca T, Camarero J, Colangelo M, Nolè A, Ripullone F. Drought-induced oak  
497 decline in the western Mediterranean region: an overview on current evidences,  
498 mechanisms and management options to improve forest resilience. *IForest -*  
499 *Biogeosciences For.* 2017;10: 796–806. doi:10.3832/for2317-010
- 500 6. Castro J, Zamora R, Hódar JA, Gomez JM. Seedling establishment of a boreal tree species  
501 (*Pinus sylvestris*) at its southernmost distribution limit: consequences of being in a  
502 marginal Mediterranean habitat. *J Ecol.* 2004;92: 266–277. doi:10.1111/j.0022-  
503 0477.2004.00870.x
- 504 7. Gómez-Aparicio L, Zamora R, Gómez JM, Hódar JA, Castro J, Baraza E. Applying plant  
505 facilitation to forest restoration: a meta-analysis of the use of shrubs as nurse plants. *Ecol*  
506 *Appl.* 2004;14: 1128–1138. doi:10.1890/03-5084
- 507 8. Gavinet J, Prévosto B, Fernandez C. Do shrubs facilitate oak seedling establishment in  
508 Mediterranean pine forest understory? *For Ecol Manag.* 2016;381: 289–296.  
509 doi:10.1016/j.foreco.2016.09.045
- 510 9. Lehto T, Zwiazek JJ. Ectomycorrhizas and water relations of trees: a review. *Mycorrhiza.*  
511 2011;21: 71–90. doi:10.1007/s00572-010-0348-9
- 512 10. Simard SW, Beiler KJ, Bingham MA, Deslippe JR, Philip LJ, Teste FP. Mycorrhizal  
513 networks: Mechanisms, ecology and modelling. *Fungal Biol Rev.* 2012;26: 39–60.  
514 doi:10.1016/j.fbr.2012.01.001
- 515 11. Rodríguez-Calcerrada J, Cano FJ, Valbuena-Carabaña M, Gil L, Aranda I. Functional  
516 performance of oak seedlings naturally regenerated across microhabitats of distinct  
517 overstorey canopy closure. *New For.* 2010;39: 245–259. doi:10.1007/s11056-009-9168-1

12. Gómez-Aparicio L, Pérez-Ramos IM, Mendoza I, Matías L, Quero JL, Castro J, et al. Oak seedling survival and growth along resource gradients in Mediterranean forests: implications for regeneration in current and future environmental scenarios. *Oikos*. 2008;117: 1683–1699. doi:10.1111/j.1600-0706.2008.16814.x
13. Niinemets Ü, Valladares F. Tolerance to shade, drought, and waterlogging of temperate northern hemisphere trees and shrubs. *Ecol Monogr*. 2006;76: 521–547. doi:10.1890/0012-9615(2006)076[0521:TTSDAW]2.0.CO;2
14. Sack L, Grubb PJ, Marañón T. The functional morphology of juvenile plants tolerant of strong summer drought in shaded forest understories in southern Spain. *Plant Ecol*. 2003;168: 139–163.
15. Pérez-Ramos IM, Rodríguez-Calcerrada J, Ourcival JM, Rambal S. *Quercus ilex* recruitment in a drier world: A multi-stage demographic approach. *Perspect Plant Ecol Evol Syst*. 2013;15: 106–117. doi:10.1016/j.ppees.2012.12.005
16. Egerton-Warburton LM, Johnson NC, Allen EB. Mycorrhizal community dynamics following nitrogen fertilization: a cross-site test in five grasslands. *Ecol Monogr*. 2007;77: 527–544. doi:10.1890/06-1772.1
17. Bingham MA, Simard S. Ectomycorrhizal Networks of *Pseudotsuga menziesii* var. *glauca* Trees Facilitate Establishment of Conspecific Seedlings Under Drought. *Ecosystems*. 2012;15: 188–199. doi:10.1007/s10021-011-9502-2
18. Querejeta J, Egerton-Warburton L, Allen M. Direct nocturnal water transfer from oaks to their mycorrhizal symbionts during severe soil drying. *Oecologia*. 2003;134: 55–64. doi:10.1007/s00442-002-1078-2
19. Richard F, Selosse M-A, Gardes M. Facilitated establishment of *Quercus ilex* in shrub-dominated communities within a Mediterranean ecosystem: do mycorrhizal partners matter?: Do mycorrhizal fungi drive establishment of *Quercus ilex*? *FEMS Microbiol Ecol*. 2009;68: 14–24. doi:10.1111/j.1574-6941.2009.00646.x
20. Tedersoo L, Bahram M, Põlme S, Kõljalg U, Yorou NS, Wijesundera R, et al. Global diversity and geography of soil fungi. *Science*. 2014;346: 1256688. doi:10.1126/science.1256688
21. Genney DR, Anderson IC, Alexander IJ. Fine-scale distribution of pine ectomycorrhizas and their extramatrical mycelium. *New Phytol*. 2006;170: 381–390. doi:10.1111/j.1469-8137.2006.01669.x
22. Richard F, Roy M, Shahin O, Sthultz C, Duchemin M, Joffre R, et al. Ectomycorrhizal communities in a Mediterranean forest ecosystem dominated by *Quercus ilex*: seasonal dynamics and response to drought in the surface organic horizon. *Ann For Sci*. 2011;68: 57–68. doi:10.1007/s13595-010-0007-5
23. Agerer R. Exploration types of ectomycorrhizae. *Mycorrhiza*. 2001;11: 107–114. doi:10.1007/s005720100108
24. Shahin O, Paul NM-S, Rambal S, Joffre R, Richard F. Ectomycorrhizal fungal diversity in *Quercus ilex* Mediterranean woodlands: variation among sites and over soil depth

- 558 profiles in hyphal exploration types, species richness and community composition.  
559 Symbiosis. 2013;61: 1–12. doi:10.1007/s13199-013-0252-0
- 560 25. Bakker MR, Augusto L, Achat DL. Fine root distribution of trees and understory in mature  
561 stands of maritime pine (*Pinus pinaster*) on dry and humid sites. Plant Soil. 2006;286: 37–  
562 51. doi:10.1007/s11104-006-9024-4
- 563 26. Milcu A, Puga-Freitas R, Ellison AM, Blouin M, Scheu S, Girin T, et al. Genotypic  
564 variability enhances the reproducibility of an ecological study. Ecology; 2016 Oct.  
565 doi:10.1101/080119
- 566 27. Limousin J-M, Rambal S, Ourcival J-M, Joffre R. Modelling rainfall interception in a  
567 mediterranean *Quercus ilex* ecosystem: Lesson from a throughfall exclusion experiment.  
568 J Hydrol. 2008;357: 57–66. doi:10.1016/j.jhydrol.2008.05.001
- 569 28. Bates D, Mächler M, Bolker B, Walker S. Fitting Linear Mixed-Effects Models using  
570 lme4. ArXiv14065823 Stat. 2014 [cited 11 Feb 2020]. Available:  
571 <http://arxiv.org/abs/1406.5823>
- 572 29. Zuur AF, editor. Mixed effects models and extensions in ecology with R. New York, NY:  
573 Springer; 2009.
- 574 30. Cesko C. Voeten (2019) buildmer: Stepwise Elimination and Term Reordering for Mixed-  
575 Effects Regression. R package version 1.4 <https://cran.r-project.org/package=buildmer>.
- 576 31. Long JA (2019). interactions: Comprehensive, User-Friendly Toolkit for Probing  
577 Interactions. R package version 1.1.0, <https://cran.r-project.org/package=interactions>.
- 578 32. Therneau T (2015). A Package for Survival Analysis in S. version 2.38, [https://cran.r-](https://cran.r-project.org/package=survival)  
579 [project.org/package=survival](https://cran.r-project.org/package=survival).
- 580 33. Joët T, Ourcival J-M, Capelli M, Dussert S, Morin X. Explanatory ecological factors for  
581 the persistence of desiccation-sensitive seeds in transient soil seed banks: *Quercus ilex* as  
582 a case study. Ann Bot. 2016;117: 165–176. doi:10.1093/aob/mcv139
- 583 34. Urbietta IR, Pérez-Ramos IM, Zavala MA, Marañón T, Kobe RK. Soil water content and  
584 emergence time control seedling establishment in three co-occurring Mediterranean oak  
585 species. Can J For Res. 2008;38: 2382–2393. doi:10.1139/X08-089
- 586 35. Matías L, Zamora R, Castro J. Sporadic rainy events are more critical than increasing of  
587 drought intensity for woody species recruitment in a Mediterranean community.  
588 Oecologia. 2012;169: 833–844. doi:10.1007/s00442-011-2234-3
- 589 36. Garrett KA, Dendy SP, Frank EE, Rouse MN, Travers SE. Climate Change Effects on  
590 Plant Disease: Genomes to Ecosystems. Annu Rev Phytopathol. 2006;44: 489–509.  
591 doi:10.1146/annurev.phyto.44.070505.143420
- 592 37. Brasier CM, Robredo F, Ferraz JFP. Evidence for *Phytophthora cinnamomi* involvement  
593 in Iberian oak decline. Plant Pathol. 1993;42: 140–145. doi:10.1111/j.1365-  
594 3059.1993.tb01482.x



- 595 38. Sanchez ME, Caetano P, Ferraz J, Trapero A. Phytophthora disease of Quercus ilex in  
596 south-western Spain. For Pathol. 2002;32: 5–18. doi:10.1046/j.1439-0329.2002.00261.x
- 597 39. Corcobado T, Cubera E, Juárez E, Moreno G, Solla A. Drought events determine  
598 performance of Quercus ilex seedlings and increase their susceptibility to Phytophthora  
599 cinnamomi. Agric For Meteorol. 2014;192–193: 1–8.  
600 doi:10.1016/j.agrformet.2014.02.007
- 601 40. Homet P, González M, Matías L, Godoy O, Pérez-Ramos IM, García LV, et al. Exploring  
602 interactive effects of climate change and exotic pathogens on Quercus suber performance:  
603 Damage caused by Phytophthora cinnamomi varies across contrasting scenarios of soil  
604 moisture. Agric For Meteorol. 2019;276–277: 107605.  
605 doi:10.1016/j.agrformet.2019.06.004
- 606 41. Khan ML, Shankar U. Effect of seed weight, light regime and substratum microsite on  
607 germination and seedling growth of Quercus semiserrata Roxb. Trop Ecol. 2001;42: 117–  
608 125.
- 609 42. Quero JL, Villar R, Maranon T, Zamora R, Poorter L. Seed-mass effects in four  
610 Mediterranean Quercus species (Fagaceae) growing in contrasting light environments.  
611 Am J Bot. 2007;94: 1795–1803. doi:10.3732/ajb.94.11.1795
- 612 43. González-Rodríguez V, Villar R, Navarro-Cerrillo RM. Maternal influences on seed mass  
613 effect and initial seedling growth in four Quercus species. Acta Oecologica. 2011;37: 1–  
614 9. doi:10.1016/j.actao.2010.10.006
- 615 44. González-Rodríguez V, Navarro-Cerrillo RM, Villar R. Artificial regeneration with  
616 Quercus ilex L. and Quercus suber L. by direct seeding and planting in southern Spain.  
617 Ann For Sci. 2011;68: 637–646. doi:10.1007/s13595-011-0057-3
- 618 45. di Pietro M, Churin J-L, Garbaye J. Differential ability of ectomycorrhizas to survive  
619 drying. Mycorrhiza. 2007;17: 547–550. doi:10.1007/s00572-007-0113-x
- 620 46. Blom JM, Vannini A, Vettriano AM, Hale MD, Godbold DL. Ectomycorrhizal  
621 community structure in a healthy and a Phytophthora-infected chestnut (Castanea sativa  
622 Mill.) stand in central Italy. Mycorrhiza. 2009;20: 25–38. doi:10.1007/s00572-009-0256-  
623 z
- 624 47. Bzdyk RM, Olchowik J, Studnicki M, Nowakowska JA, Oszako T, Urban A, et al.  
625 Ectomycorrhizal Colonisation in Declining Oak Stands on the Krotoszyn Plateau, Poland.  
626 Forests. 2019;10: 30. doi:10.3390/f10010030
- 627 48. Marx, Donald H. Growth of ectomycorrhizal and nonmycorrhizal shortleaf pine seedlings  
628 in soil with Phytophthora cinnamomi. Phytopathology, 1973, vol. 63, no 1, p. 18-23.
- 629 49. Ruiz Gómez FJ, Navarro-Cerrillo RM, Pérez-de-Luque A, Oßwald W, Vannini A,  
630 Morales-Rodríguez C. Assessment of functional and structural changes of soil fungal and  
631 oomycete communities in holm oak declined dehesas through metabarcoding analysis. Sci  
632 Rep. 2019;9: 5315. doi:10.1038/s41598-019-41804-y
- 633 50. Montecchio L, Causin R, Rossi S, Accordi SM. Changes in ectomycorrhizal diversity in  
634 a declining Quercus ilex coastal forest. Phytopathol Mediterr. 2004;43: 9.



51. Pérez-Ramos IM, Ourcival JM, Limousin JM, Rambal S. Mast seeding under increasing drought: results from a long-term data set and from a rainfall exclusion experiment. *Ecology*. 2010;91: 3057–3068. doi:10.1890/09-2313.1
52. Gavinet J, Ourcival J, Limousin J. Rainfall exclusion and thinning can alter the relationships between forest functioning and drought. *New Phytol*. 2019;223: 1267–1279. doi:10.1111/nph.15860
53. Sanchez-Humanes B, Espelta JM. Increased drought reduces acorn production in *Quercus ilex* coppices: thinning mitigates this effect but only in the short term. *Forestry*. 2011;84: 73–82. doi:10.1093/forestry/cpq045

## Supporting information

**S1 Fig. The effect of SWC (% volumetric) per cage in survival of emerged plants per individual.**  
n = 391.

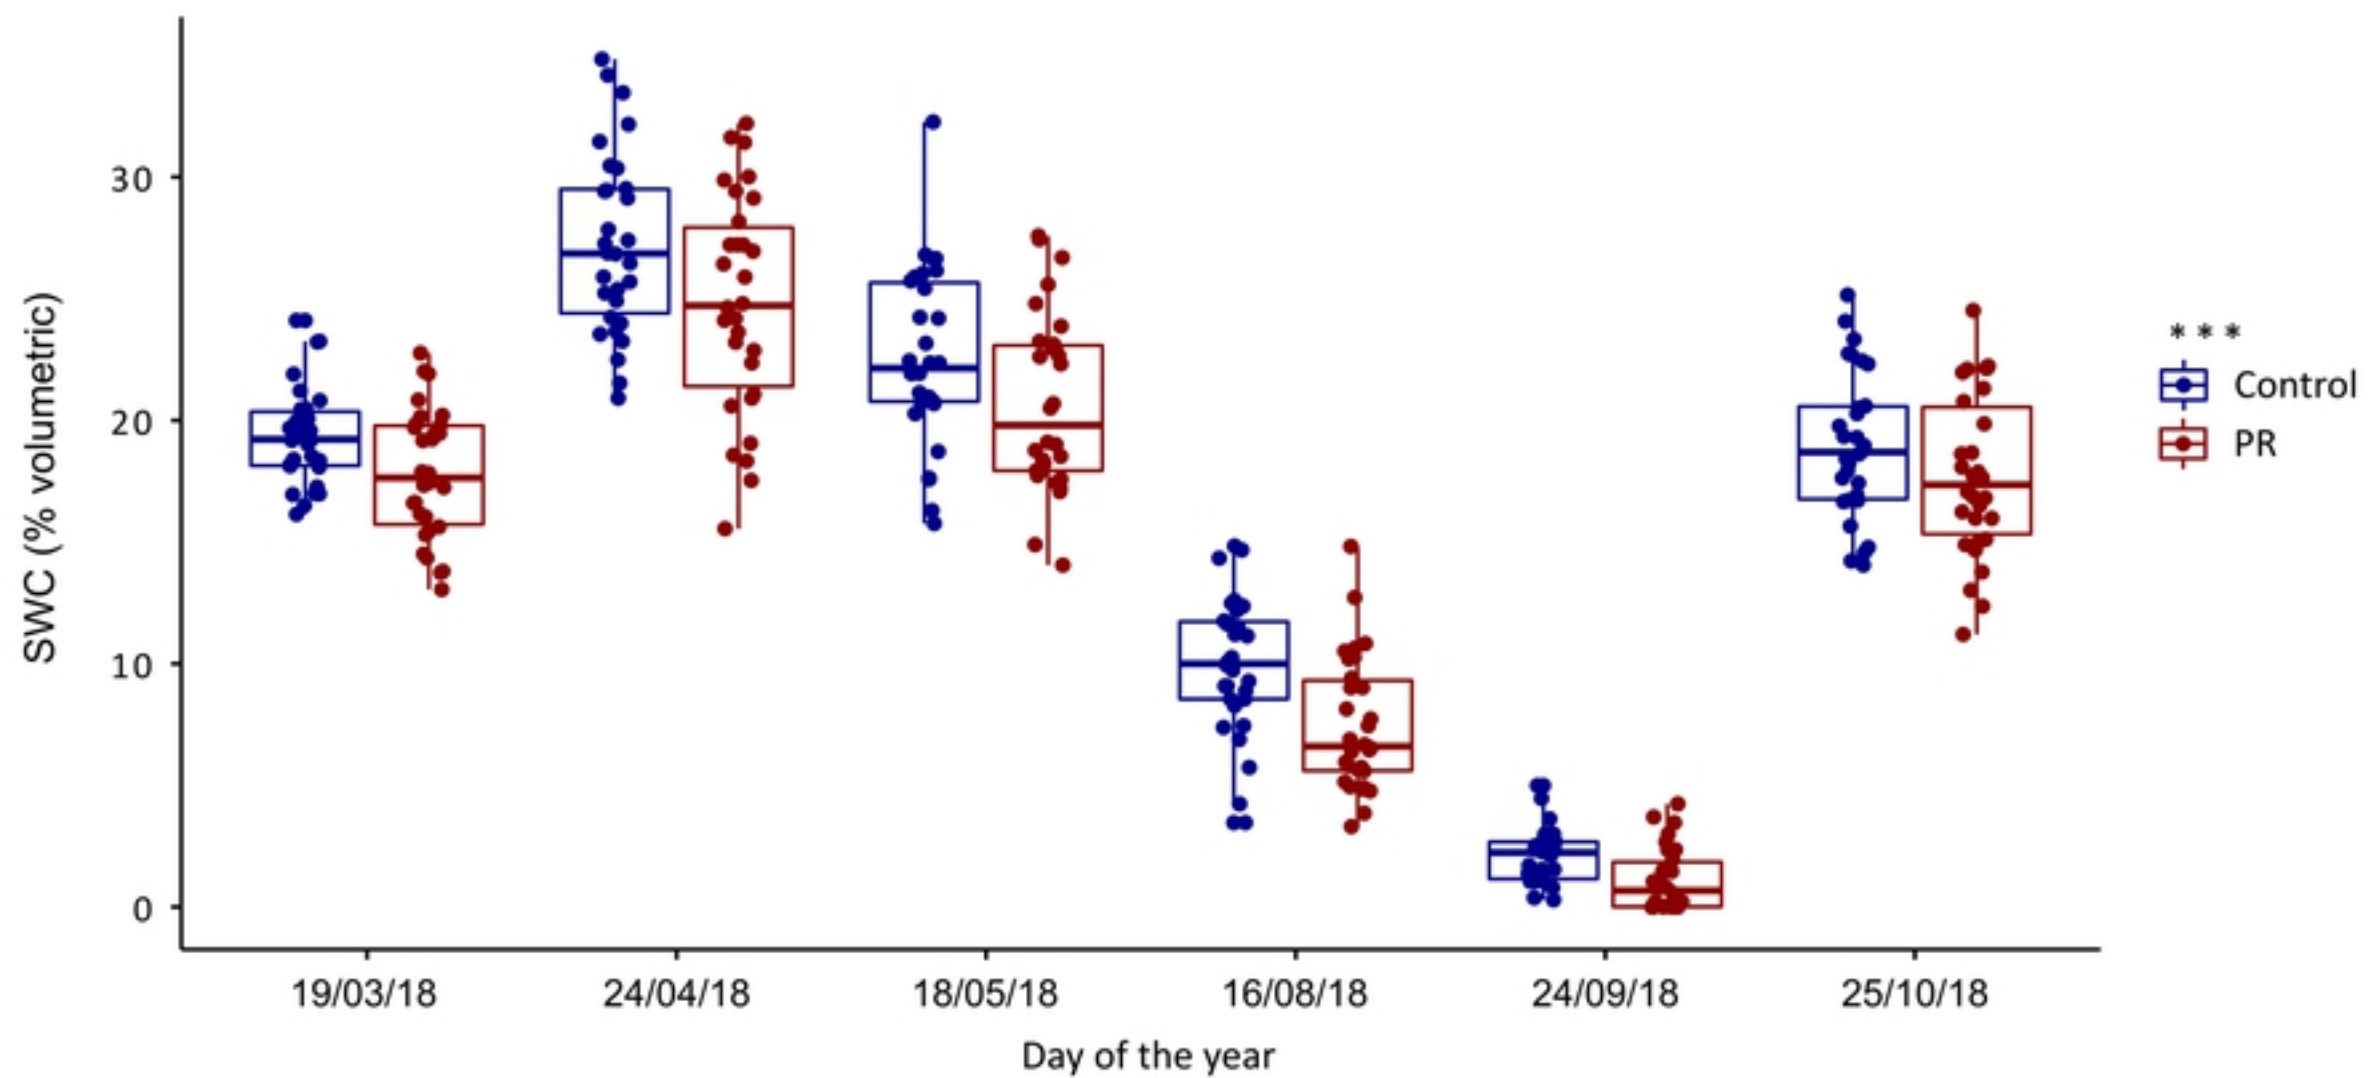

Fig1

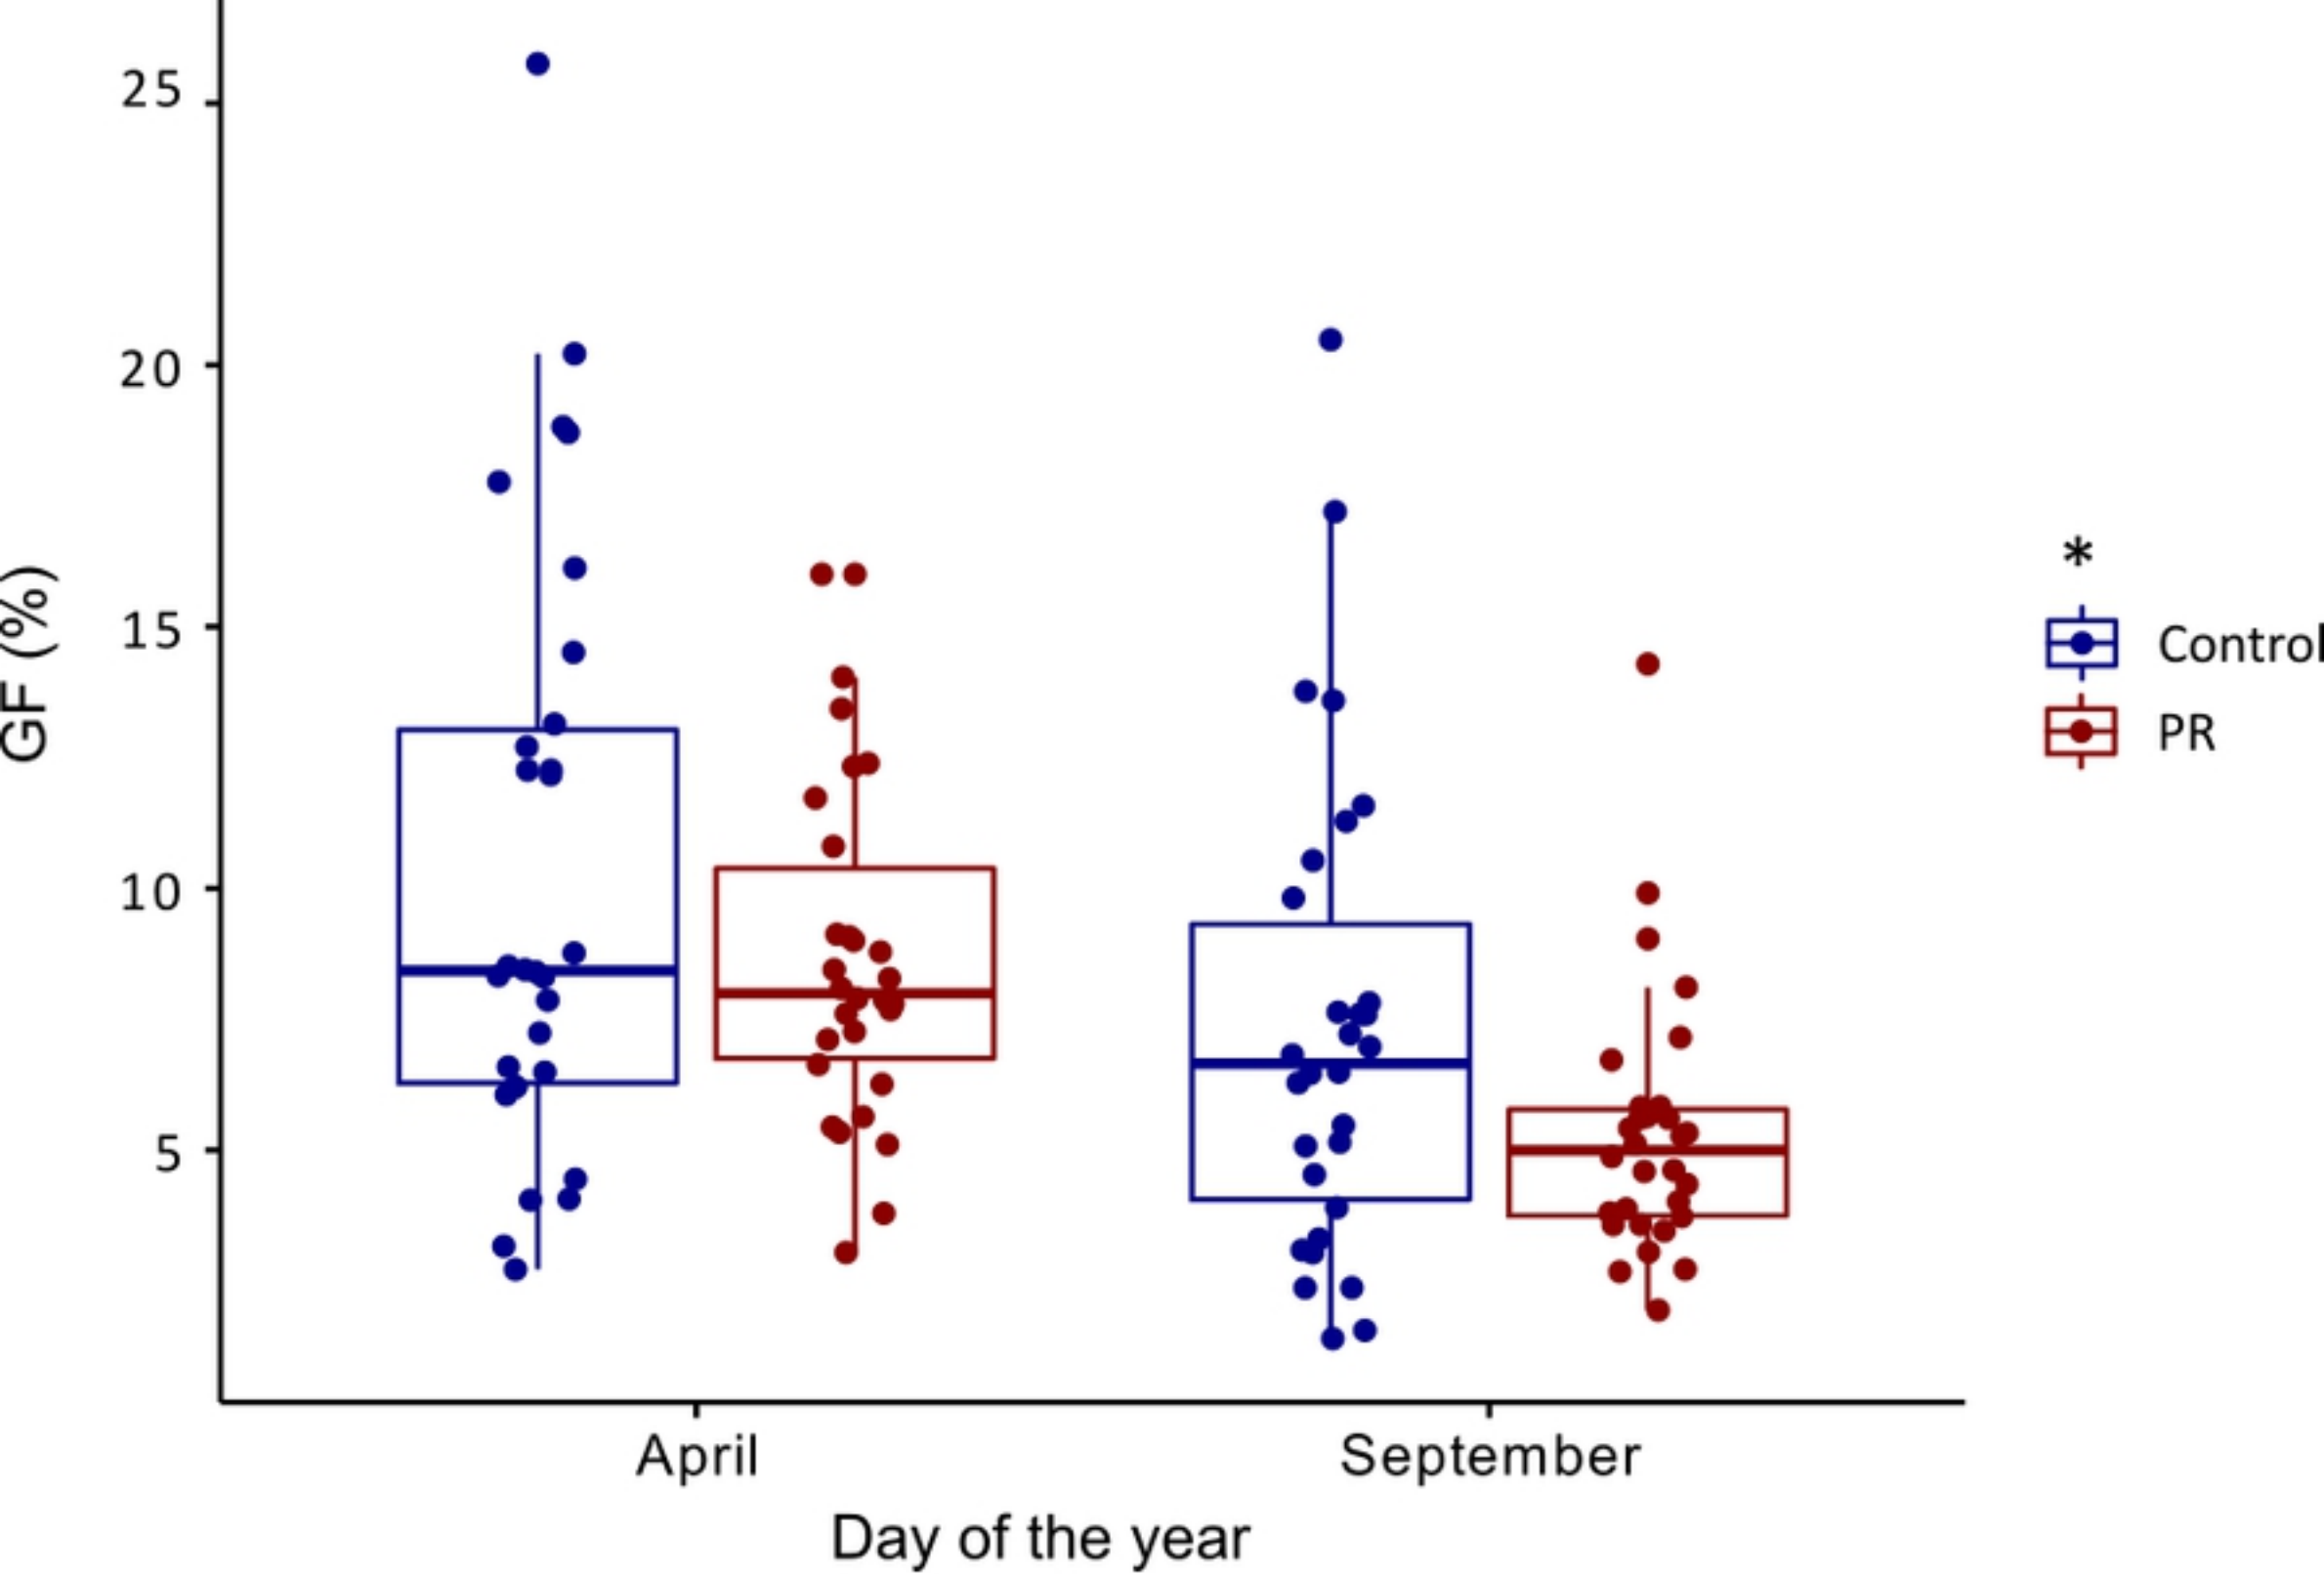

Fig2

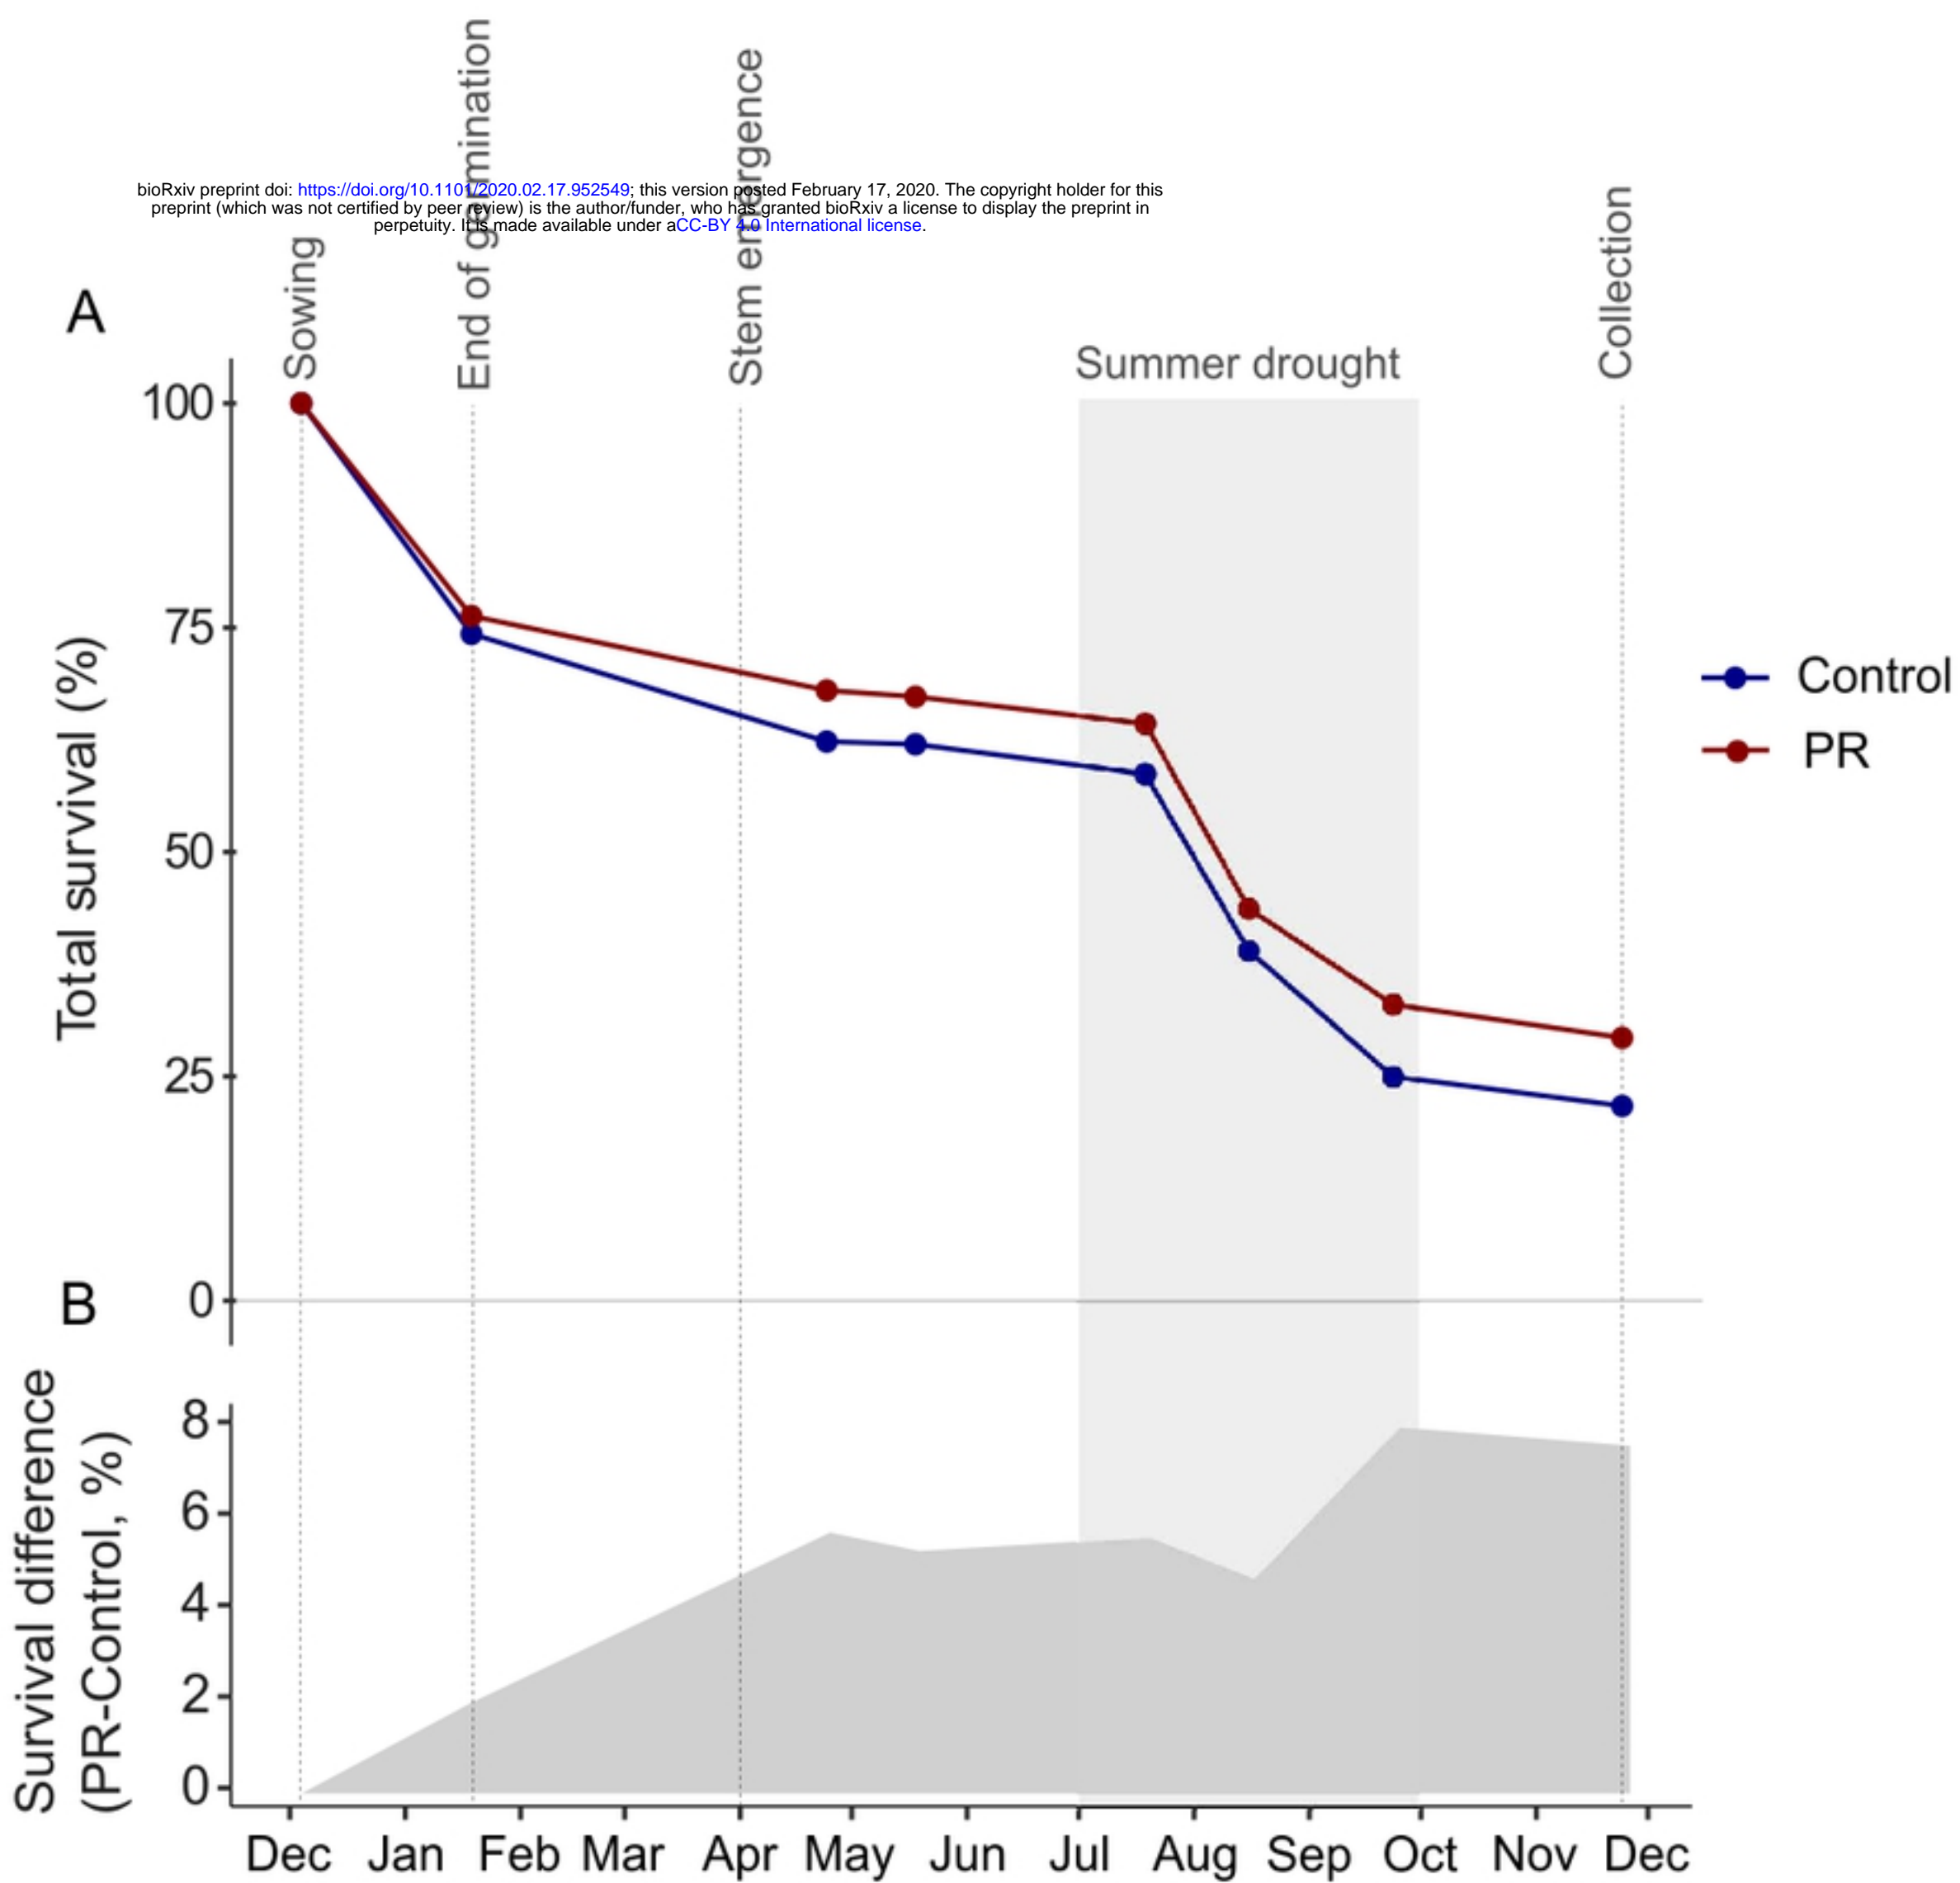

Fig3

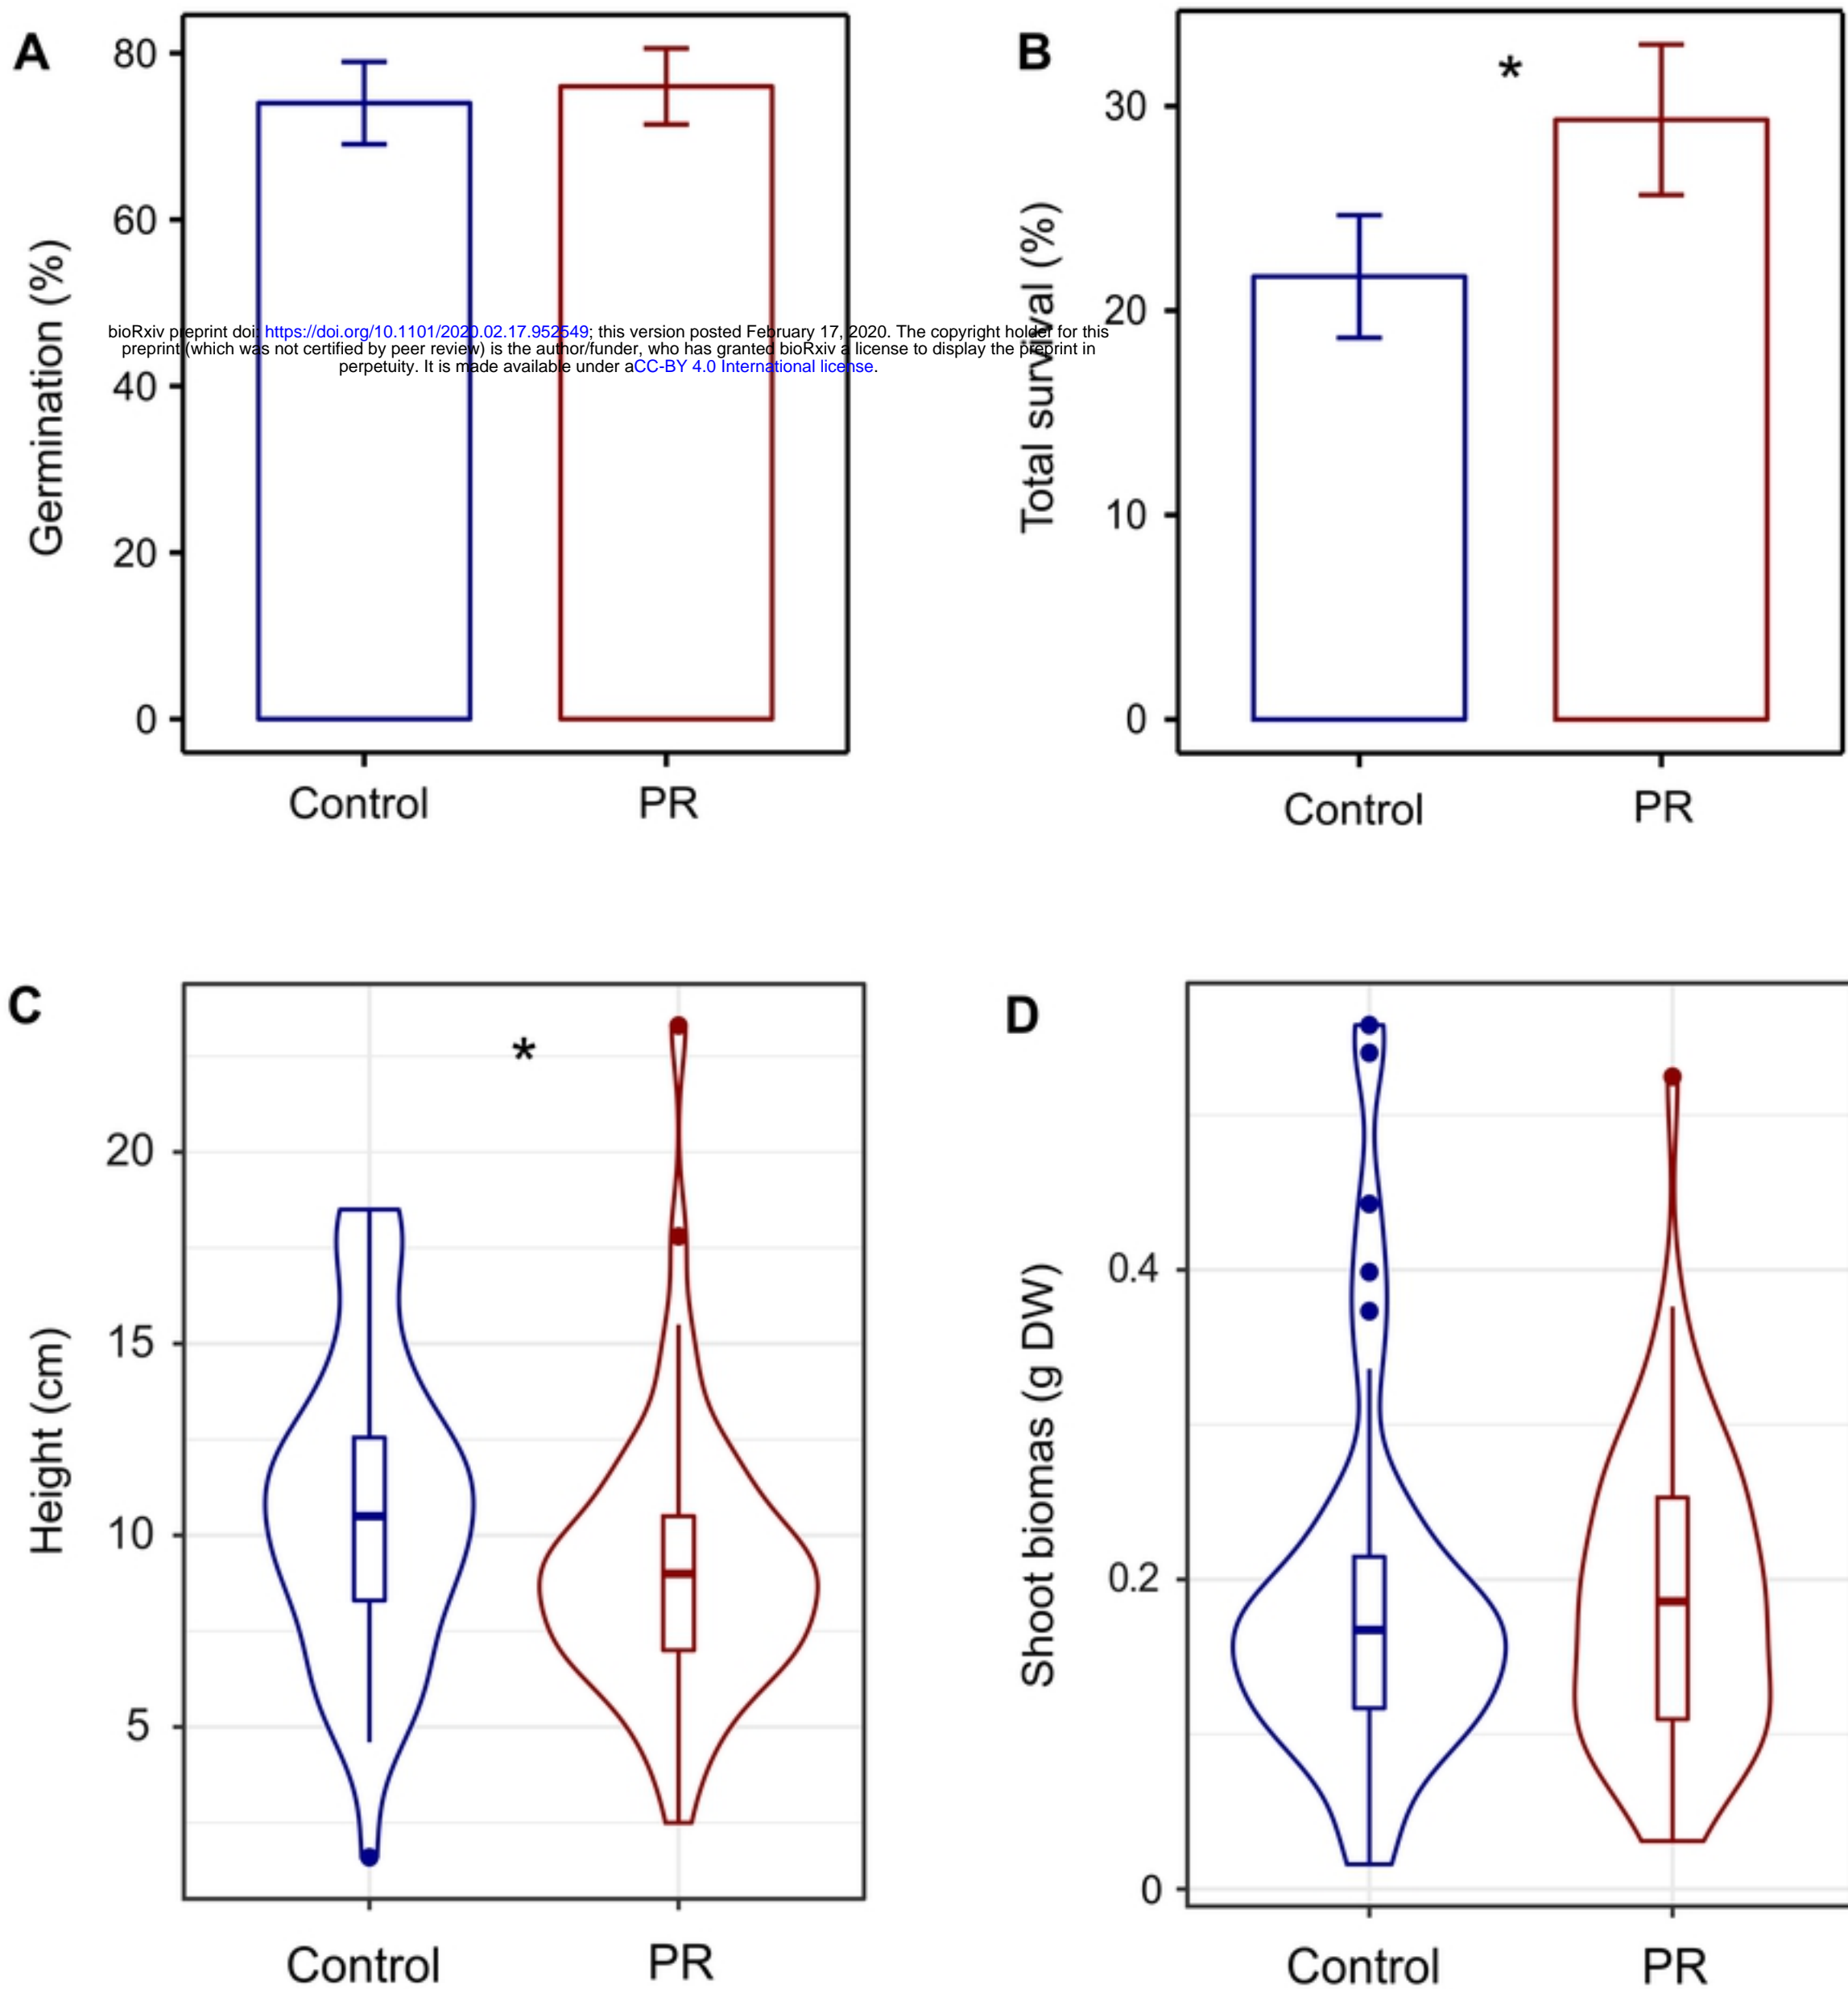

Fig4

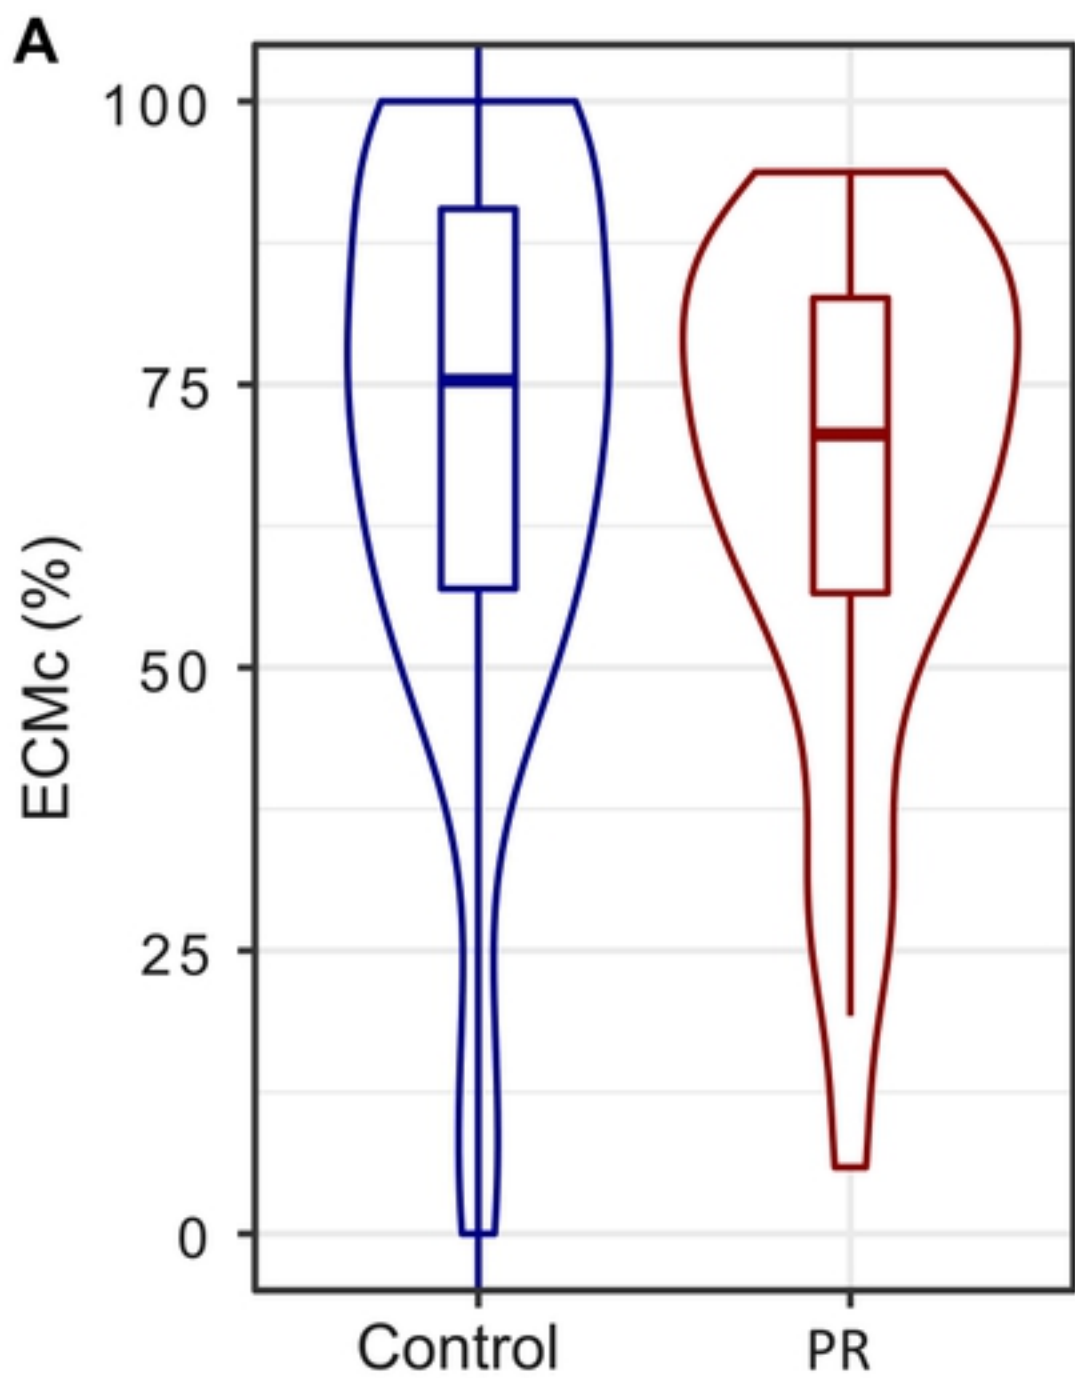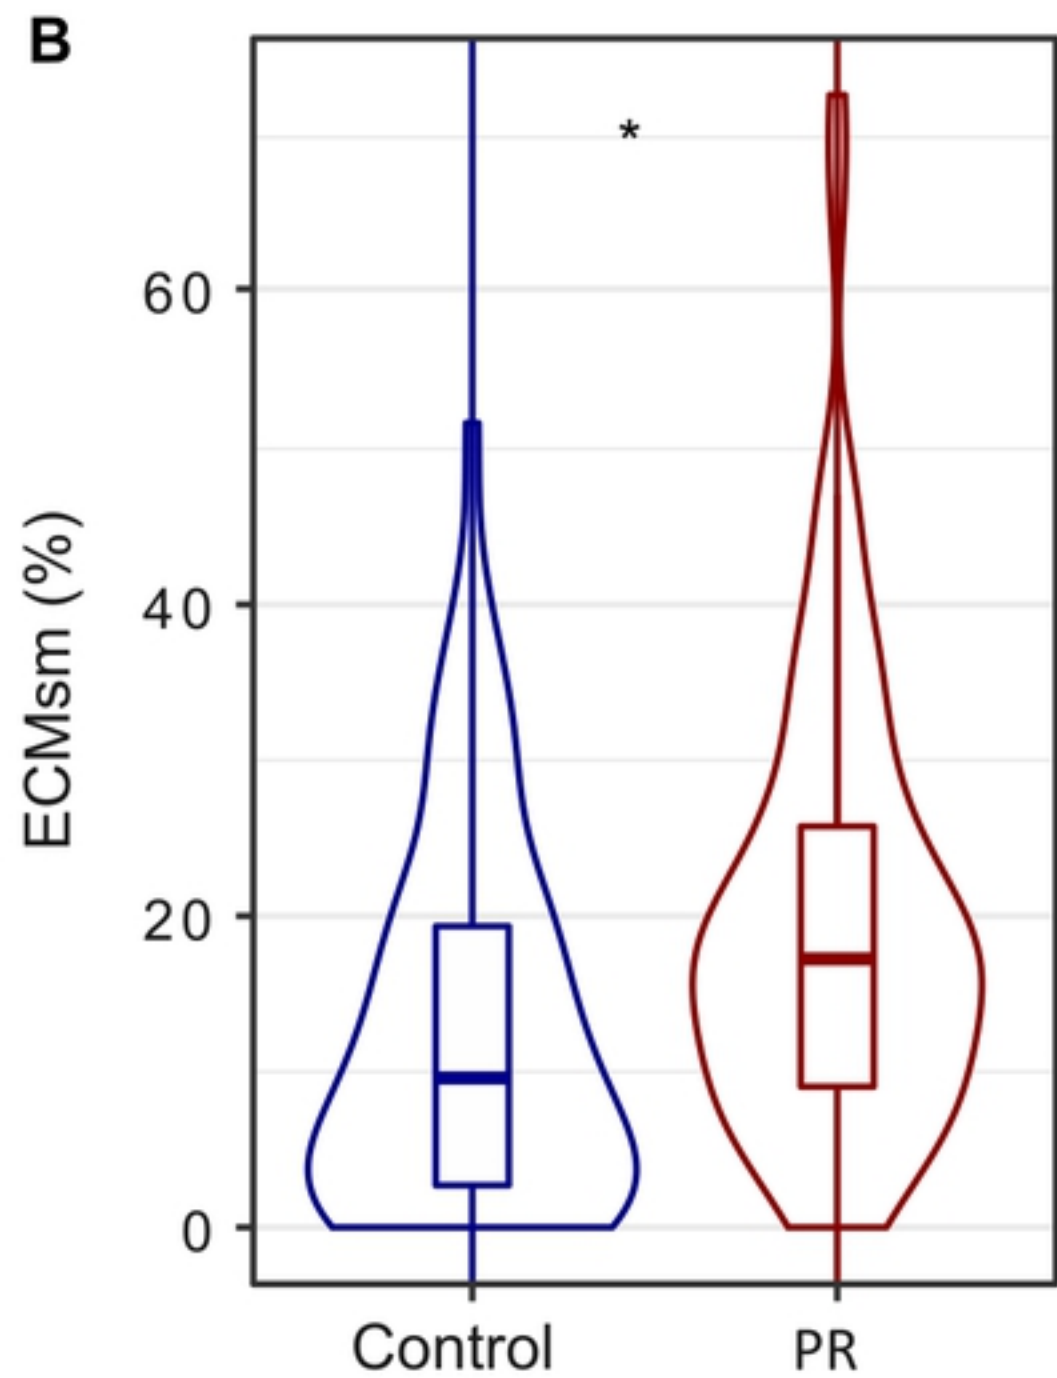

Fig5

**A**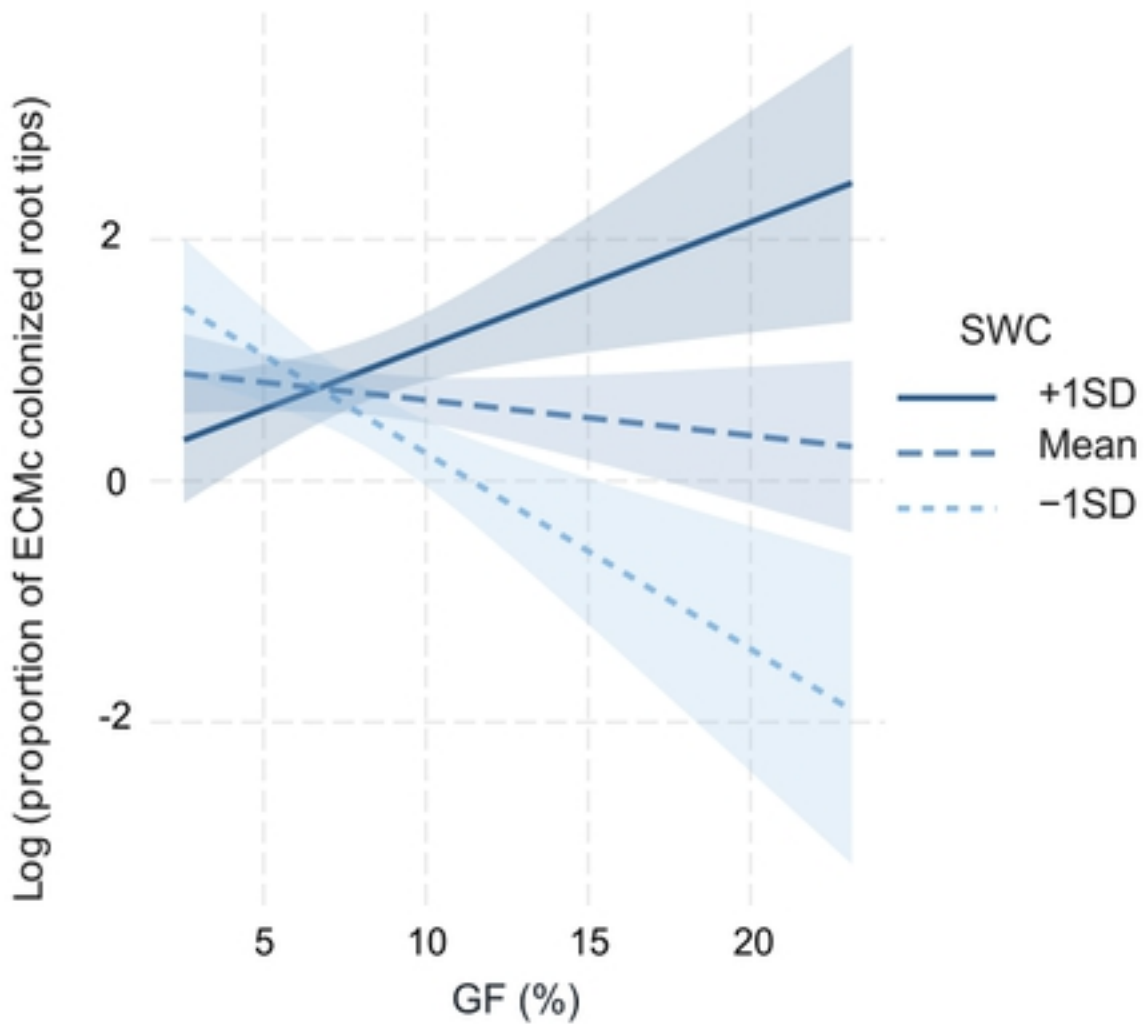**B**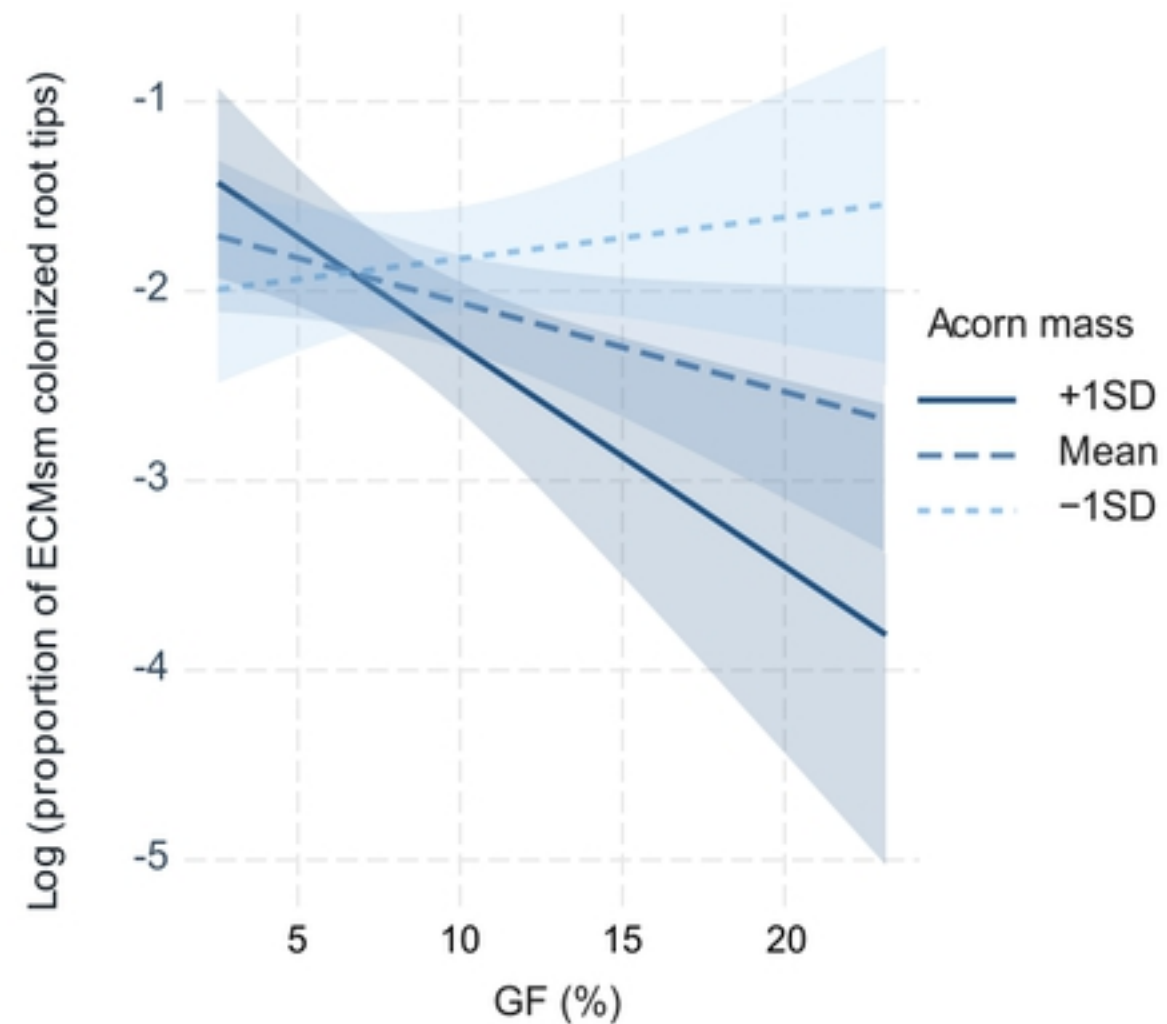**Fig6**
